# Supplementary material for: Environmental cystine drives glutamine anaplerosis and sensitizes cancer cells to glutaminase inhibition
Source: eLife journal article supplement (doi:10.7554/elife.27713), 2017-08-15
Supplement: supp [file elife-27713-supp-v1.zip]

Archive with 20 entries (20 files):
- elife_poa_e27713_Figure2Supplement1.pdf
- elife_poa_e27713_Figure_2_Source_Data_1.xlsx
- elife_poa_e27713_Figure_2_Source_Data_2.xlsx
- elife_poa_e27713_Figure4Supplement1.pdf
- elife_poa_e27713_Figure3Supplement1.pdf
- elife_poa_e27713_Figure3Supplement2.pdf
- elife_poa_e27713_Figure_1_Source_Data_2.xlsx
- elife_poa_e27713_Figure_1_Source_Data_1.xlsx
- elife_poa_e27713_Figure4Supplement2.pdf
- elife_poa_e27713_Figure_3_Source_Data_1.xlsx
- elife_poa_e27713_Transparent_Reporting_File.pdf
- elife_poa_e27713_Figure1Supplement2.pdf
- elife_poa_e27713_Figure_1_Source_Data_4.xlsx
- elife_poa_e27713_Figure_5_Source_Data_1.xlsx
- elife_poa_e27713_Figure1Supplement3.pdf
- elife_poa_e27713_Figure4Supplement3.pdf
- elife_poa_e27713_Figure1Supplement1.pdf
- elife_poa_e27713_Figure_4_Source_Data_1.xlsx
- elife_poa_e27713_Figure4Supplement4.pdf
- elife_poa_e27713_Figure_1_Source_Data_3.xlsx
