# Supplementary material for: Environmental cystine drives glutamine anaplerosis and sensitizes cancer cells to glutaminase inhibition
Source: eLife journal article supplement (doi:10.7554/elife.27713), 2017-08-15
Supplement: supp [file elife-27713-supp-v1.zip › elife_poa_e27713_Figure_1_Source_Data_1.xlsx]

## Sheet: Fig1B
				Tumor				Plasma
Metabolite	Label	Mouse 1 Tumor 1	Mouse 1 Tumor 2	Mouse 2 Tumor 1	Mouse 2 Tumor 2	Mouse 3 Tumor 1	Mouse 1	Mouse 2	Mouse 3
Fum_287	M0	0.8472	0.8329	0.8941	0.9072	0.878
Fum_288	M1	0.0537	0.053	0.037	0.0339	0.0414
Fum_289	M2	0.0408	0.0432	0.0295	0.0261	0.032
Fum_290	M3	0.0208	0.0241	0.0131	0.0108	0.0155
Fum_291	M4	0.0387	0.0465	0.0278	0.0218	0.0327
Mal_419	M0	0.8581	0.8403	0.9027	0.9178	0.8895
Mal_420	M1	0.0526	0.0566	0.0383	0.0346	0.0402
Mal_421	M2	0.0306	0.0338	0.0176	0.0156	0.0223
Mal_422	M3	0.0215	0.0227	0.0139	0.0108	0.0159
Mal_423	M4	0.0375	0.0463	0.0271	0.0209	0.0323
Asp_418	M0	0.8914	0.8678	0.9347	0.9549	0.9183
Asp_419	M1	0.0393	0.0407	0.0207	0.0172	0.0231
Asp_420	M2	0.0268	0.0335	0.018	0.0108	0.0207
Asp_421	M3	0.0142	0.0189	0.0085	0.0065	0.013
Asp_422	M4	0.0294	0.0401	0.0194	0.0119	0.0251
Glu_432	M0	0.8292	0.8164	0.8714	0.8734	0.8604
Glu_433	M1	0.0484	0.048	0.0331	0.0352	0.0388
Glu_434	M2	0.0269	0.0279	0.0181	0.0178	0.0208
Glu_435	M3	0.0276	0.0304	0.0195	0.0177	0.0227
Glu_436	M4	0.0026	0.0029	0.002	0.0021	0.0021
Glu_437	M5	0.0655	0.0746	0.0559	0.0535	0.0552
Gln_431	M0	0.6945	0.6763	0.7188	0.7399	0.7171	0.6434	0.492	0.6126
Gln_432	M1	0.0216	0.0251	0.0222	0.0212	0.0204	0.0248	0.0204	0.0208
Gln_433	M2	0.0088	0.0082	0.008	0.0083	0.006	0.0086	0.0067	0.0065
Gln_434	M3	0.0108	0.0114	0.0099	0.0092	0.0093	0.0121	0.0091	0.0098
Gln_435	M4	0.0101	0.0104	0.0089	0.008	0.0093	0.0118	0.0174	0.0127
Gln_436	M5	0.2507	0.2655	0.2307	0.2129	0.2341	0.2979	0.4527	0.3353
Cit_591	M0	0.8294	0.822	0.8762	0.8841	0.8623
Cit_592	M1	0.074	0.0695	0.0587	0.0579	0.0586
Cit_593	M2	0.0198	0.0232	0.0153	0.009	0.0135
Cit_594	M3	0.0264	0.0269	0.0152	0.0174	0.0222
Cit_595	M4	0.0143	0.0153	0.0123	0.0116	0.0118
Cit_596	M5	0.0357	0.0412	0.0216	0.0201	0.0318
Cit_597	M6	0.0011	0.0022	0.0022	0.0013	0.001
Akg_346	M0	0.8457	0.8304	0.8805	0.8894	0.8674
Akg_347	M1	0.0364	0.0413	0.0264	0.021	0.0365
Akg_348	M2	0.0228	0.0235	0.0156	0.0165	0.018
Akg_349	M3	0.0271	0.0309	0.0192	0.0188	0.023
Akg_350	M4	0.0056	0.0047	0.004	0.0053	0.004
Akg_351	M5	0.0623	0.0693	0.0538	0.0494	0.0517

## Sheet: Fig1C
Metabolite	Label	RPMI 1	RPMI 2	RPMI 3	Adult bovine serum 1	Adult bovine serum 2	Adult bovine serum 3
Fum_287	M0	0.7223	0.724	0.7201	0.8323	0.8426	0.831
Fum_288	M1	0.0007	0.0129	0.0056	0.0173	0.0053	0.014
Fum_289	M2	0.0286	0.0249	0.0281	0.039	0.0431	0.047
Fum_290	M3	0.0659	0.0665	0.0648	0.0132	0.0137	0.0142
Fum_291	M4	0.1792	0.1778	0.1804	0.1019	0.0979	0.1052
Mal_419	M0	0.7346	0.7601	0.7426	0.8562	0.8604	0.8752
Mal_420	M1	0.0001	-0.0137	-0.0027	0.0065	0.0088	-0.009
Mal_421	M2	0.0149	0.0157	0.0177	0.0256	0.0216	0.0224
Mal_422	M3	0.0652	0.0612	0.0642	0.012	0.0092	0.0114
Mal_423	M4	0.1853	0.1834	0.178	0.1048	0.1037	0.0983
Asp_418	M0	0.7453	0.7403	0.7444	0.8645	0.8585	0.8673
Asp_419	M1	0	0.0038	-0.0031	-0.0011	0.0029	-0.0006
Asp_420	M2	0.0165	0.0191	0.0191	0.0234	0.0248	0.02
Asp_421	M3	0.0613	0.0628	0.0614	0.014	0.0117	0.0148
Asp_422	M4	0.1781	0.1786	0.1802	0.1011	0.1036	0.1028
Glu_432	M0	0.7172	0.7267	0.7198	0.8498	0.8466	0.8494
Glu_433	M1	-0.0016	-0.0065	-0.0046	-0.0023	0.0003	-0.0024
Glu_434	M2	0.0031	0.002	0.0028	0.0049	0.0049	0.0042
Glu_435	M3	0.0122	0.0128	0.0129	0.0245	0.0242	0.0251
Glu_436	M4	0.0048	0.0038	0.0055	0.0042	0.0049	0.0045
Glu_437	M5	0.2664	0.2635	0.2661	0.1196	0.1203	0.1204
Gln_431	M0	0.6823	0.6862	0.6866	0.6573	0.6593	0.6708
Gln_432	M1	-0.0003	-0.0007	-0.002	0.0131	0.0027	-0.0097
Gln_433	M2	-0.0019	-0.0042	-0.0025	-0.0027	0.0072	-0.0024
Gln_434	M3	0.0009	0.0016	0.0016	-0.0015	-0.0056	-0.0023
Gln_435	M4	-0.0052	0.0014	0.0005	0.009	0.0051	0.0089
Gln_436	M5	0.3248	0.3149	0.3167	0.3365	0.3332	0.3454
Cit_591	M0	0.7139	0.7896	0.7885	0.8771	0.871	0.8789
Cit_592	M1	0.0145	-0.0022	-0.0111	-0.0028	0.0062	0.0074
Cit_593	M2	0.0387	0.0254	0.0186	0.0181	0.0145	0.0005
Cit_594	M3	0.0231	-0.0031	0.0195	0.0234	0.0169	0.0255
Cit_595	M4	0.114	0.1318	0.1209	0.075	0.0798	0.0796
Cit_596	M5	0.098	0.0911	0.1019	0.0147	0.0173	0.014
Cit_597	M6	0.0069	-0.0139	-0.0209	-0.0008	-0.0036	-0.0019
Akg_346	M0	0.721	0.8698	0.735	0.9098	0.9237	0.9511
Akg_347	M1	0.0191	-0.0426	0.0008	-0.0001	0.0009	-0.0315
Akg_348	M2	0.013	-0.0468	-0.001	-0.0017	-0.0036	0.0093
Akg_349	M3	-0.0122	-0.0006	-0.0058	0.0089	0.0048	0.0032
Akg_350	M4	0.0061	0.0026	0.0068	-0.0051	-0.004	-0.0045
Akg_351	M5	0.2659	0.2881	0.2844	0.1054	0.0905	0.0954
