# Supplementary material for: Environmental cystine drives glutamine anaplerosis and sensitizes cancer cells to glutaminase inhibition
Source: eLife journal article supplement (doi:10.7554/elife.27713), 2017-08-15
Supplement: supp [file elife-27713-supp-v1.zip › elife_poa_e27713_Figure_1_Source_Data_2.xlsx]

## Sheet: Fig1Supp1
Metabolite	Label	Adult bovine serum 8h 1	Adult bovine serum 8h 2	Adult bovine serum 8h 3	Adult bovine serum 24h 1	Adult bovine serum 24h 2	Adult bovine serum 24h 3
Fum_287	M0	0.8283	0.8341	0.831	0.8184	0.8156	0.8257
Fum_288	M1	0.0048	0.0017	0.009	0.0087	0.0163	0.0053
Fum_289	M2	0.0416	0.0345	0.0295	0.0312	0.036	0.031
Fum_290	M3	0.0153	0.0184	0.0157	0.0142	0.013	0.0135
Fum_291	M4	0.092	0.0929	0.0955	0.0948	0.0909	0.0922
Mal_419	M0	0.8709	0.8667	0.8685	0.8635	0.8608	0.8648
Mal_420	M1	-0.0009	0.0097	0.0024	0.0034	0.0046	0.0035
Mal_421	M2	0.0271	0.0187	0.0257	0.0235	0.0253	0.0222
Mal_422	M3	0.0176	0.0161	0.0126	0.0151	0.0173	0.0149
Mal_423	M4	0.0849	0.0925	0.092	0.0944	0.0929	0.0948
Asp_418	M0	0.8622	0.8715	0.8701	0.8708	0.8688	0.877
Asp_419	M1	0.0096	0.0024	0.001	0.0098	0.0094	0.0064
Asp_420	M2	0.0148	0.0159	0.0187	0.0158	0.0204	0.0148
Asp_421	M3	0.0166	0.0168	0.0151	0.0147	0.0134	0.0133
Asp_422	M4	0.0971	0.0933	0.0946	0.0876	0.0882	0.0891
Glu_432	M0	0.8558	0.8602	0.8595	0.859	0.8592	0.8577
Glu_433	M1	-0.002	-0.0043	-0.0023	-0.006	-0.0044	-0.0036
Glu_434	M2	0.0029	0.0023	0.0028	0.0031	0.0023	0.0026
Glu_435	M3	0.0204	0.021	0.0199	0.0219	0.0218	0.0213
Glu_436	M4	0.0082	0.008	0.0079	0.0077	0.0077	0.0076
Glu_437	M5	0.1159	0.1136	0.113	0.1155	0.1143	0.1149
Gln_431	M0	0.6145	0.5981	0.611	0.6363	0.622	0.6355
Gln_432	M1	0.0216	0.011	0.0093	-0.0047	0.0081	0.0048
Gln_433	M2	0.0094	0.0039	-0.0033	0.0063	0.0026	-0.0008
Gln_434	M3	-0.0112	-0.004	0.0034	0.0026	-0.002	0.0002
Gln_435	M4	0.0087	0.0139	0.0152	0.0066	0.0105	0.0063
Gln_436	M5	0.3322	0.3493	0.3403	0.3431	0.3493	0.3417
Cit_591	M0	0.8946	0.8942	0.9034	0.8856	0.8848	0.8824
Cit_592	M1	-0.0091	-0.0018	-0.0084	-0.0035	-0.0024	-0.0013
Cit_593	M2	0.0208	0.0145	0.0171	0.0165	0.0153	0.0188
Cit_594	M3	0.0139	0.0143	0.0118	0.0158	0.0167	0.016
Cit_595	M4	0.0671	0.067	0.0653	0.0691	0.0685	0.0653
Cit_596	M5	0.0146	0.0116	0.0117	0.0172	0.0178	0.0206
Cit_597	M6	-0.0009	0.0009	-0.0003	-0.0009	0.0005	-0.0014
Akg_346	M0	0.9092	0.9006	0.9023	0.8943	0.8931	0.886
Akg_347	M1	0.0073	0.0121	0.0093	0.0001	0.0016	0.0068
Akg_348	M2	-0.0013	0.0014	0.0032	0.0009	0.0025	0.003
Akg_349	M3	0.0154	0.0124	0.0129	0.0132	0.0142	0.0152
Akg_350	M4	-0.003	0.0038	0.0068	0.0034	-0.0004	0.0053
Akg_351	M5	0.0804	0.0775	0.0706	0.091	0.091	0.0858
