# Supplementary material for: Environmental cystine drives glutamine anaplerosis and sensitizes cancer cells to glutaminase inhibition
Source: eLife journal article supplement (doi:10.7554/elife.27713), 2017-08-15
Supplement: supp [file elife-27713-supp-v1.zip › elife_poa_e27713_Figure_1_Source_Data_3.xlsx]

## Sheet: Fig1Supp2
Metabolite	Label	RPMI 1	RPMI 2	RPMI 3	Adult bovine serum 1	Adult bovine serum 2	Adult bovine serum 3	Adult bovine plasma 1	Adult bovine plasma 2	Adult bovine plasma 3	Adult human serum 1	Adult human serum 2	Adult human serum 3
Fum_287	M0	0.7225	0.7253	0.7223	0.8449	0.8443	0.8471	0.8229	0.8251	0.8216	0.8673	0.8714	0.8733
Fum_288	M1	0.002	0.0003	0.0012	0.0059	0.0075	0.0009	0.0078	0.0078	0.0109	0.0051	0.0012	0.0035
Fum_289	M2	0.0285	0.0307	0.0325	0.0351	0.0332	0.0324	0.039	0.0385	0.0389	0.0275	0.026	0.0242
Fum_290	M3	0.0589	0.0558	0.053	0.0107	0.0113	0.0125	0.0121	0.0129	0.0128	0.0105	0.0105	0.0113
Fum_291	M4	0.1777	0.1794	0.1802	0.08	0.0807	0.0854	0.0955	0.0939	0.0944	0.0738	0.0779	0.0761
Mal_419	M0	0.7318	0.7374	0.7304	0.8776	0.8741	0.8774	0.8501	0.8553	0.8514	0.8943	0.8855	0.8912
Mal_420	M1	0.0027	0.001	0.0019	0.0051	0.006	0.0028	0.0084	0.0021	0.0064	-0.0012	0.0035	0.0025
Mal_421	M2	0.0228	0.0217	0.0244	0.0218	0.0216	0.0238	0.0297	0.0293	0.0309	0.0193	0.0231	0.0175
Mal_422	M3	0.0546	0.0569	0.0553	0.0111	0.0127	0.0093	0.012	0.0141	0.0127	0.0088	0.0073	0.0104
Mal_423	M4	0.1884	0.1828	0.1879	0.0838	0.0854	0.0872	0.099	0.099	0.0995	0.0783	0.0788	0.0777
Asp_418	M0	0.7438	0.7466	0.7476	0.8774	0.8844	0.8798	0.8511	0.8561	0.8526	0.9006	0.8962	0.8979
Asp_419	M1	0.004	0.0018	-0.0016	0.0051	0.0003	0.0016	0.0109	0.0028	0.0099	-0.0011	0.0014	0.0004
Asp_420	M2	0.0215	0.0216	0.022	0.0236	0.022	0.0218	0.0285	0.031	0.028	0.0163	0.0172	0.0156
Asp_421	M3	0.0533	0.0531	0.0534	0.0106	0.0103	0.013	0.0118	0.0128	0.012	0.0081	0.009	0.0092
Asp_422	M4	0.1793	0.1784	0.1801	0.0829	0.0824	0.0835	0.0984	0.0987	0.0979	0.0763	0.0765	0.0767
Glu_432	M0	0.7053	0.7035	0.7036	0.8523	0.8523	0.8507	0.8208	0.8258	0.8213	0.8719	0.8673	0.8716
Glu_433	M1	0.0019	0.003	0.0023	0.0093	0.0087	0.0072	0.0153	0.0117	0.0155	0.0114	0.0117	0.0105
Glu_434	M2	0.0054	0.0052	0.0056	0.0074	0.0062	0.0074	0.0093	0.0075	0.0085	0.0049	0.0057	0.0061
Glu_435	M3	0.0184	0.0188	0.0189	0.0249	0.0251	0.0251	0.0299	0.0303	0.0298	0.0174	0.0185	0.0174
Glu_436	M4	0.01	0.01	0.0102	0.0038	0.0039	0.0036	0.0046	0.0045	0.0045	0.0035	0.0036	0.0032
Glu_437	M5	0.2604	0.2611	0.2614	0.103	0.1048	0.1063	0.121	0.1212	0.1211	0.0917	0.0939	0.092
Gln_431	M0	0.6536	0.6526	0.6547	0.6531	0.6585	0.6567	0.6795	0.6787	0.6796	0.6598	0.6596	0.6575
Gln_432	M1	0.0009	0.0011	-0.0008	-0.0004	-0.0037	0.0012	-0.0019	-0.0009	0.0012	0.001	-0.0016	0.0014
Gln_433	M2	-0.0008	-0.0011	-0.0004	0.0003	0.0014	-0.0005	-0.001	-0.0005	-0.0011	-0.0021	-0.001	-0.0002
Gln_434	M3	0.0003	0.0006	0.0005	0.0017	0.0003	0.0001	0.0014	0.0008	0.0007	0.0006	0.0005	0.0004
Gln_435	M4	0.0089	0.0126	0.0111	0.0117	0.0072	0.0098	0.0115	0.0103	0.0039	0.0082	0.013	0.0099
Gln_436	M5	0.3383	0.3349	0.3359	0.3296	0.3319	0.3317	0.3111	0.3119	0.3172	0.332	0.3301	0.3315
Cit_591	M0	0.7035	0.7009	0.705	0.8828	0.8766	0.8813	0.8574	0.8567	0.857	0.9126	0.9049	0.9101
Cit_592	M1	0.0015	0.0054	0.0052	0.0046	0.0092	0.0038	0.0091	0.008	0.0083	0.0016	0.0015	-0.0025
Cit_593	M2	0.0383	0.0392	0.0363	0.0213	0.0213	0.0215	0.0279	0.0277	0.0306	0.0127	0.0159	0.0182
Cit_594	M3	0.0464	0.048	0.0464	0.0138	0.0139	0.0147	0.0138	0.016	0.0142	0.0103	0.0112	0.01
Cit_595	M4	0.1293	0.1255	0.1279	0.0622	0.0637	0.0633	0.0764	0.077	0.0753	0.0506	0.0545	0.0519
Cit_596	M5	0.0713	0.0713	0.0711	0.0132	0.0136	0.0138	0.0139	0.0122	0.0123	0.0081	0.009	0.0089
Cit_597	M6	0.0047	0.0046	0.0041	0.0004	-0.0001	0	0.0001	0.0011	0.0012	0.001	0.0006	0.0009
Akg_346	M0	0.7096	0.6986	0.7035	0.8978	0.8853	0.8939	0.8749	0.873	0.8704	0.8934	0.8872	0.8889
Akg_347	M1	0.005	0.0087	0.0064	-0.0007	0.0124	0.005	0.0023	0.0064	0.0091	-0.0044	-0.0001	0.0035
Akg_348	M2	0.0049	0.0052	0.0063	0.0085	0.0029	0.0052	0.0057	0.0034	0.0055	0.007	0.0039	0.0046
Akg_349	M3	0.021	0.0201	0.0238	0.0182	0.0222	0.0197	0.0263	0.0251	0.0251	0.0177	0.0184	0.0162
Akg_350	M4	0.0038	0.0089	0.0064	0.0023	0.001	0.0022	0.0007	0.0036	0.0027	0.0029	0.0021	0.0035
Akg_351	M5	0.2597	0.2608	0.2557	0.0738	0.0775	0.0747	0.0885	0.089	0.0872	0.0837	0.0855	0.0847
