# Supplementary material for: Environmental cystine drives glutamine anaplerosis and sensitizes cancer cells to glutaminase inhibition
Source: eLife journal article supplement (doi:10.7554/elife.27713), 2017-08-15
Supplement: supp [file elife-27713-supp-v1.zip › elife_poa_e27713_Figure_1_Source_Data_4.xlsx]

## Sheet: Fig1Supp3
				ASPC1						MDAMB231						143B						HCT116						PC3						TT
Metabolite	Label	RPMI 1	RPMI 2	RPMI 3	Adult bovine serum 1	Adult bovine serum 2	Adult bovine serum 3	RPMI 1	RPMI 2	RPMI 3	Adult bovine serum 1	Adult bovine serum 2	Adult bovine serum 3	RPMI 1	RPMI 2	RPMI 3	Adult bovine serum 1	Adult bovine serum 2	Adult bovine serum 3	RPMI 1	RPMI 2	RPMI 3	Adult bovine serum 1	Adult bovine serum 2	Adult bovine serum 3	RPMI 1	RPMI 2	RPMI 3	Adult bovine serum 1	Adult bovine serum 2	Adult bovine serum 3	RPMI 1	RPMI 2	RPMI 3	Adult bovine serum 1	Adult bovine serum 2	Adult bovine serum 3
Fum_287	M0	0.701	0.7019	0.7073	0.8104	0.8011	0.7954	0.7728	0.7735	0.7681	0.8898	0.8861	0.8907	0.7269	0.7275	0.7252	0.8067	0.8098	0.8109	0.7025	0.7037	0.7072	0.7966	0.8025	0.7967	0.6728	0.6712	0.6718	0.7217	0.7161	0.7335	0.6979	0.6942	0.6953	0.7516	0.7575	0.7566
Fum_288	M1	-0.0017	0.0043	-0.0021	0.0173	0.0163	0.0175	0.0121	0.0114	0.0077	0.0119	0.0167	0.0112	-0.0011	-0.0008	0	0.0082	0.009	0.0102	0.0052	0.004	0.0031	0.0271	0.0208	0.0256	0.0037	0.0046	0.0056	0.0279	0.0339	0.0277	-0.0007	0.0051	0.0043	0.0124	0.0114	0.0104
Fum_289	M2	0.0261	0.0241	0.0252	0.041	0.0462	0.0466	0.0366	0.0383	0.0404	0.0327	0.0323	0.0343	0.0209	0.0208	0.0217	0.0391	0.0369	0.0396	0.034	0.0344	0.0338	0.0516	0.053	0.0511	0.0347	0.0349	0.0344	0.0702	0.0695	0.0643	0.0253	0.0255	0.0256	0.0374	0.0391	0.0367
Fum_290	M3	0.0539	0.0544	0.0536	0.0111	0.0077	0.0108	0.0314	0.0322	0.0319	0.0073	0.0059	0.0047	0.0533	0.0519	0.0528	0.0083	0.0097	0.0089	0.041	0.0409	0.0399	0.0088	0.0072	0.0105	0.0682	0.0671	0.0662	0.0128	0.0131	0.0123	0.0672	0.0677	0.0677	0.0095	0.0102	0.0103
Fum_291	M4	0.2151	0.219	0.2189	0.1179	0.1266	0.1325	0.1496	0.1453	0.1507	0.0651	0.0592	0.0637	0.1963	0.1957	0.1967	0.1383	0.1348	0.1298	0.2133	0.2143	0.2111	0.1165	0.117	0.1165	0.2161	0.2204	0.2195	0.1616	0.164	0.1595	0.1679	0.1681	0.1637	0.1034	0.0998	0.1019
Mal_419	M0	0.7076	0.707	0.711	0.8226	0.8108	0.8057	0.7774	0.7753	0.7785	0.8959	0.9047	0.8989	0.7392	0.73	0.7366	0.8193	0.8217	0.8211	0.7183	0.7131	0.7132	0.8098	0.813	0.8124	0.6808	0.6818	0.6819	0.7307	0.7331	0.7374	0.7343	0.7315	0.7322	0.8312	0.8289	0.8349
Mal_420	M1	0.0031	0.0042	0.0024	0.0193	0.0163	0.0214	0.0124	0.0133	0.0121	0.014	0.0109	0.0115	-0.0005	0.0056	0.0009	0.0095	0.0103	0.0137	0.0038	0.0076	0.0091	0.0224	0.0224	0.0229	0.0051	0.0083	0.0057	0.035	0.0291	0.0314	-0.0025	-0.0014	-0.0015	0.0096	0.012	0.0069
Mal_421	M2	0.0157	0.0129	0.0183	0.0305	0.0357	0.0339	0.0285	0.0322	0.0318	0.0213	0.0245	0.0241	0.0124	0.0132	0.0129	0.0274	0.025	0.028	0.0245	0.0252	0.0239	0.0453	0.0421	0.0405	0.0257	0.0218	0.0261	0.0546	0.056	0.0553	0.021	0.0208	0.0243	0.0357	0.0377	0.0371
Mal_422	M3	0.0545	0.0557	0.0522	0.0105	0.0132	0.0117	0.0323	0.0317	0.0298	0.0078	0.0035	0.0034	0.0524	0.0525	0.0522	0.0107	0.0093	0.0084	0.0399	0.0394	0.0394	0.008	0.0094	0.0105	0.0686	0.069	0.0663	0.0153	0.0165	0.0147	0.0689	0.0686	0.0693	0.0091	0.0092	0.0102
Mal_423	M4	0.2195	0.2213	0.217	0.1162	0.1239	0.1275	0.1508	0.1467	0.1469	0.0604	0.0567	0.0612	0.195	0.1997	0.1985	0.1326	0.1328	0.1281	0.2151	0.2143	0.2146	0.114	0.1128	0.1142	0.2194	0.22	0.2217	0.1633	0.1642	0.1617	0.1759	0.1833	0.1737	0.1152	0.1126	0.1111
Asp_418	M0	0.729	0.7254	0.719	0.7828	0.7854	0.7841	0.7945	0.8054	0.8093	0.8955	0.9	0.8973	0.7415	0.7431	0.7448	0.8134	0.8123	0.8159	0.7417	0.7767	0.7679	0.8144	0.812	0.8173	0.6894	0.6993	0.6942	0.7297	0.732	0.7323	0.7467	0.7492	0.7432	0.8542	0.8495	0.8498
Asp_419	M1	0.0033	0.0027	0.0025	0.0141	0.0132	0.0142	0.0081	0.0084	0.01	0.0115	0.014	0.0175	-0.0008	-0.0012	-0.0011	0.0075	0.0068	0.0056	0.0033	0.0001	0.0019	0.0201	0.0235	0.0176	0.0078	0.007	0.0056	0.0303	0.0256	0.0292	-0.0007	-0.0029	0.0015	0.0064	0.0101	0.0082
Asp_420	M2	0.0234	0.0232	0.0247	0.0463	0.0454	0.0481	0.0358	0.0338	0.032	0.0298	0.0235	0.024	0.0168	0.0165	0.016	0.0336	0.0351	0.0336	0.0261	0.0242	0.0252	0.0471	0.0494	0.0456	0.0339	0.0309	0.0336	0.0607	0.0639	0.0601	0.0188	0.0205	0.0203	0.0311	0.0293	0.0321
Asp_421	M3	0.0458	0.0476	0.0477	0.0133	0.0134	0.0133	0.0242	0.0225	0.022	0.003	0.0043	0.0046	0.0488	0.0493	0.0484	0.008	0.0082	0.0078	0.0361	0.0305	0.0306	0.0071	0.0061	0.0064	0.054	0.0526	0.0537	0.0135	0.013	0.0136	0.065	0.0638	0.0644	0.0084	0.0103	0.0082
Asp_422	M4	0.2002	0.203	0.2085	0.1443	0.1442	0.1414	0.1395	0.1315	0.1278	0.0617	0.061	0.0598	0.1964	0.1949	0.194	0.1391	0.1394	0.1393	0.1955	0.1708	0.1772	0.1133	0.1099	0.1154	0.2168	0.2121	0.2148	0.168	0.1672	0.1665	0.172	0.1708	0.1715	0.1007	0.1014	0.1016
Glu_432	M0	0.6992	0.6976	0.6932	0.7822	0.7721	0.774	0.729	0.7313	0.7286	0.8414	0.8449	0.8425	0.6892	0.6911	0.6895	0.7485	0.7514	0.7521	0.6852	0.689	0.6877	0.7736	0.7781	0.7751	0.6587	0.6622	0.6592	0.7032	0.7034	0.708	0.7009	0.7034	0.7018	0.7894	0.7913	0.7915
Glu_433	M1	0.0025	0.0016	0.0023	0.0073	0.0089	0.0077	0.0082	0.0081	0.0101	0.0177	0.0169	0.016	0.0106	0.0097	0.0106	0.0176	0.0168	0.0172	0.0059	0.0067	0.0059	0.0197	0.0179	0.0193	0.008	0.0061	0.0085	0.03	0.0302	0.0287	0.0042	0.0039	0.0044	0.0141	0.0137	0.0132
Glu_434	M2	0.0037	0.0048	0.0053	0.008	0.0072	0.0069	0.0098	0.0097	0.0104	0.01	0.0099	0.0107	0.0053	0.0047	0.0049	0.0087	0.0083	0.0084	0.0065	0.0071	0.0072	0.0127	0.0115	0.0119	0.0088	0.0092	0.0089	0.0186	0.0176	0.0176	0.0051	0.005	0.0052	0.0078	0.0085	0.0082
Glu_435	M3	0.0106	0.0102	0.0111	0.0293	0.0313	0.0316	0.0354	0.0342	0.0345	0.0345	0.0331	0.0339	0.0132	0.013	0.0131	0.0338	0.0345	0.0341	0.023	0.0231	0.0228	0.0453	0.0448	0.0453	0.0235	0.023	0.0244	0.0642	0.0644	0.0637	0.015	0.0154	0.0163	0.0355	0.0349	0.0356
Glu_436	M4	0.0108	0.0095	0.0105	0.0059	0.0062	0.0059	0.0083	0.0083	0.0087	0.0033	0.0034	0.003	-0.0111	-0.0112	-0.0113	0.0078	0.0074	0.0074	0.0094	0.0043	0.0109	0.0052	0.0049	0.005	0.012	0.0116	0.0118	0.0066	0.0062	0.0063	0.0102	0.0103	0.01	0.0051	0.0055	0.0053
Glu_437	M5	0.2745	0.2775	0.2785	0.1624	0.1667	0.1669	0.2105	0.2099	0.2087	0.0932	0.0919	0.0939	0.2923	0.2921	0.2927	0.1837	0.1819	0.1812	0.2707	0.2699	0.2664	0.1426	0.1423	0.1428	0.2899	0.2893	0.2882	0.1777	0.1785	0.176	0.2655	0.2632	0.2631	0.1493	0.1471	0.147
Gln_431	M0	0.6635	0.6631	0.6635	0.6469	0.6431	0.659	0.6717	0.6623	0.6687	0.6509	0.6527	0.6496	0.6601	0.6638	0.662	0.6449	0.6405	0.6446	0.665	0.6617	0.6655	0.6396	0.6448	0.6435	0.6466	0.7157	0.6469	0.6181	0.6095	0.6116	0.669	0.6694	0.6705	0.6468	0.6578	0.6408
Gln_432	M1	0.0036	0.0032	0.0037	-0.001	0.001	-0.0053	-0.0009	0.0046	0.0017	0.0012	-0.0001	0.0021	0.0096	0.0076	0.0084	0.006	0.0073	0.0063	0.0062	0.0095	0.0063	0.0016	0.0023	0.0016	0.0024	0.0036	0.0029	0.0045	0.0082	0.0052	-0.0006	-0.002	-0.0008	0.0041	-0.0041	0.0051
Gln_433	M2	-0.0009	-0.0011	-0.0018	-0.0003	-0.0004	0.0006	-0.0017	-0.0006	-0.0016	-0.0011	0.0005	-0.0022	-0.0001	-0.0005	0	-0.0004	-0.0001	-0.0003	0.0001	-0.0003	0.0001	-0.0005	-0.0008	0	-0.0009	-0.001	-0.0008	-0.0004	0.0003	0.0033	-0.0008	-0.0005	-0.0011	-0.0031	0.0018	-0.0007
Gln_434	M3	0.0005	0.0004	0.0007	0.0015	0.0013	0.001	0.0014	0.0006	0.001	0.0018	0.002	0.0028	0.0001	0.0005	0.0002	0.0027	0.0028	0.0027	0.0002	0.0001	0.0002	0.0015	0.0016	0.0015	0.0009	0.0009	0.001	0.0113	0.0112	0.0102	0.0003	0.0005	0.0007	0.0004	-0.0004	0
Gln_435	M4	0.001	0.0056	0.0044	0.0104	0.01	0.008	0.0043	-0.0015	0.0005	0.0059	0.0014	0.002	-0.0055	-0.0065	-0.0063	-0.0057	-0.0011	-0.0023	-0.0063	-0.0061	-0.0056	-0.0032	0.0029	0.004	0.0016	0.0088	0.0016	0.0081	0.0146	0.0042	0.0121	0.0119	0.0119	0.0137	0.0124	0.014
Gln_436	M5	0.3297	0.3267	0.3271	0.3385	0.3391	0.3319	0.3201	0.3223	0.3219	0.3348	0.338	0.343	0.3314	0.3306	0.3311	0.343	0.3428	0.3425	0.3314	0.3318	0.3296	0.3463	0.3443	0.3447	0.3439	0.2673	0.3429	0.3525	0.3561	0.3591	0.3218	0.3225	0.3208	0.3349	0.3282	0.3374
Cit_591	M0	0.7152	0.7136	0.7152	0.9038	0.8743	0.8676	0.7806	0.7823	0.7763	0.9071	0.9171	0.9135	0.7269	0.7259	0.7308	0.8208	0.8222	0.8322	0.6975	0.6963	0.7029	0.8232	0.8262	0.8247	0.7782	0.7939	0.8104	0.6779	0.6783	0.6722	0.7481	0.7399	0.7317	0.8517	0.8608	0.8514
Cit_592	M1	0.0445	0.0317	0.0235	0.012	0.0125	0.0155	0.016	0.0164	0.0166	0.0163	0.0202	0.0148	0.011	0.0108	0.0108	0.0098	0.0107	0.014	0.0165	0.0172	0.0147	0.0279	0.0278	0.0257	0.0362	0.0293	0.0288	0.0185	0.0287	0.0309	-0.004	0.0149	0.0131	0.0081	0.0015	0.0102
Cit_593	M2	0.0196	0.0273	0.0363	0.0171	0.024	0.0235	0.0322	0.0343	0.0376	0.0167	0.0061	0.012	0.0117	0.0088	0.0068	0.0235	0.0228	0.02	0.0362	0.0405	0.0387	0.0333	0.0347	0.0313	0.0423	0.0379	0.0361	0.041	0.04	0.0406	0.0194	0.007	0.0182	0.024	0.022	0.0239
Cit_594	M3	0.0237	0.0208	0.0249	0.0076	0.01	0.011	0.0326	0.0337	0.028	0.0089	0.0093	0.0092	0.0451	0.0464	0.0482	0.0167	0.0174	0.0156	0.0389	0.0385	0.0386	0.0126	0.0116	0.0145	0.0176	0.0195	0.015	0.032	0.0274	0.0308	0.0492	0.0538	0.0421	0.0168	0.0189	0.0171
Cit_595	M4	0.1048	0.1125	0.1118	0.0491	0.0642	0.0669	0.1221	0.1135	0.1229	0.0489	0.045	0.0483	0.1657	0.1722	0.1717	0.1228	0.121	0.1128	0.1814	0.1783	0.1766	0.1019	0.0993	0.1024	0.112	0.1052	0.097	0.1224	0.1289	0.128	0.1097	0.1089	0.1139	0.0876	0.0854	0.0852
Cit_596	M5	0.0776	0.0718	0.0809	0.0065	0.0088	0.0102	0.0156	0.0203	0.017	0.0013	0.0022	0.0028	0.0355	0.0319	0.0305	0.0056	0.0056	0.0053	0.0234	0.0246	0.0221	0.0013	0.0009	0.001	0.0153	0.0151	0.013	0.1007	0.096	0.0938	0.0815	0.0764	0.0862	0.0125	0.0117	0.0125
Cit_597	M6	0.0074	0.0142	-0.0006	0.001	0.0016	0.0013	0.0023	0.0019	0.0034	0.0022	0.0008	0.0001	0.0015	0.0014	0.0022	0.0012	0.0002	0	0.0079	0.0069	0.0081	0.0002	-0.0004	0.0008	-0.0003	0	0.0008	0.0078	0.0038	0.007	0.0001	0.0047	-0.0001	0.0006	0	-0.0002
Akg_346	M0	0.6949	0.6768	0.6613	0.9095	0.8945	0.897	0.7173	0.7209	0.7257	0.8944	0.9016	0.8901	0.7052	0.7099	0.7116	0.8569	0.8459	0.8589	0.6997	0.698	0.699	0.8478	0.8608	0.8412	0.6764	0.6689	0.6698	0.7952	0.8065	0.8299	0.7074	0.7002	0.7151	0.8792	0.888	0.8707
Akg_347	M1	0.0061	0.0206	0.0353	0.0087	0.0029	0.0009	0.0154	0.019	0.0103	0.0083	0.0078	0.0091	-0.0022	-0.0029	0.002	0.0052	0.006	0.0058	0.001	0.0022	0.0027	0.0153	0.013	0.0122	0.0012	0.0058	0.0038	0.0206	0.0183	0.0122	0.0062	0.0181	0.0038	0.0107	0.0062	0.0131
Akg_348	M2	0.0272	0.0285	0.0172	0.0074	0.016	0.0175	0.0178	0.0121	0.0133	0.0073	0.0084	0.0104	0.0038	0.0009	0.0004	0.0045	0.0074	-0.0004	0.0078	0.0105	0.0083	0.013	0.0061	0.0135	0.0103	0.005	0.0107	0.0126	0.0132	0.0104	0.0019	0	0.0035	0.0021	0.0029	0.0053
Akg_349	M3	0.0067	0.0082	0.0062	0.0072	0.0089	0.0126	0.0367	0.0371	0.0355	0.0241	0.0203	0.0229	0.0138	0.015	0.0123	0.0214	0.0245	0.0233	0.024	0.0235	0.0241	0.0291	0.0285	0.0346	0.0191	0.0216	0.0207	0.0461	0.0416	0.0377	0.0166	0.0126	0.0128	0.0205	0.02	0.02
Akg_350	M4	0.0061	0.0037	0.0021	0.0038	0.0025	0.0036	0.0063	0.0036	0.0063	0.0027	0.0037	0.0039	0.0077	0.0071	0.0032	0.0058	0.004	0.0055	0.0067	0.0087	0.0105	0.0104	0.0127	0.0093	0.0085	0.0099	0.005	0.0054	0.0057	0.0048	0.01	0.009	0.0052	0.0019	0.0038	0.0053
Akg_351	M5	0.2324	0.2261	0.2469	0.0584	0.0638	0.061	0.1965	0.1997	0.2035	0.0605	0.055	0.0628	0.2723	0.2697	0.2719	0.1073	0.1106	0.1059	0.2625	0.256	0.2541	0.0851	0.0802	0.0876	0.2789	0.2876	0.286	0.1181	0.1133	0.104	0.261	0.2613	0.2581	0.0843	0.0857	0.088
