# Supplementary material for: Environmental cystine drives glutamine anaplerosis and sensitizes cancer cells to glutaminase inhibition
Source: eLife journal article supplement (doi:10.7554/elife.27713), 2017-08-15
Supplement: supp [file elife-27713-supp-v1.zip › elife_poa_e27713_Figure_2_Source_Data_1.xlsx]

## Sheet: Fig2B
Metabolite	Label	Adult bovine serum -> RPMI 1	Adult bovine serum -> RPMI 2	Adult bovine serum -> RPMI 3	RPMI -> adult bovine serum 1	RPMI -> adult bovine serum 2	RPMI -> adult bovine serum 3
Fum_287	M0	0.8569	0.8621	0.8607	0.7053	0.7055	0.7087
Fum_288	M1	0.0052	-0.0017	-0.0052	0.0035	0	0.0037
Fum_289	M2	0.0288	0.0295	0.0339	0.0334	0.033	0.0307
Fum_290	M3	0.0169	0.0182	0.0156	0.0431	0.042	0.0431
Fum_291	M4	0.0879	0.0856	0.0881	0.2058	0.2151	0.2048
Mal_419	M0	0.8806	0.8815	0.8809	0.725	0.7183	0.727
Mal_420	M1	0.0021	0.0032	0.0047	0.002	-0.0014	0.0009
Mal_421	M2	0.0157	0.0131	0.0117	0.0199	0.0246	0.0197
Mal_422	M3	0.0169	0.018	0.0141	0.0435	0.0399	0.0423
Mal_423	M4	0.0851	0.0858	0.0909	0.2114	0.219	0.2111
Asp_418	M0	0.8885	0.8832	0.8824	0.7581	0.7507	0.7516
Asp_419	M1	-0.0062	0.004	-0.0034	0	0.0006	0.0012
Asp_420	M2	0.0178	0.0144	0.019	0.0222	0.0211	0.0222
Asp_421	M3	0.017	0.0149	0.0169	0.0352	0.0358	0.0358
Asp_422	M4	0.0835	0.0855	0.0869	0.1859	0.1937	0.1911
Glu_432	M0	0.8506	0.8519	0.8564	0.7006	0.6955	0.7025
Glu_433	M1	0.0053	0.0047	0.0007	0.0028	0.0024	0.0016
Glu_434	M2	0.0041	0.0037	0.0044	0.0055	0.0053	0.005
Glu_435	M3	0.0183	0.0182	0.0183	0.022	0.0221	0.0222
Glu_436	M4	0.0043	0.0043	0.004	0.01	0.0102	0.0098
Glu_437	M5	0.117	0.117	0.1158	0.2608	0.2661	0.2608
Gln_431	M0	0.6399	0.6373	0.6353	0.6257	0.6295	0.6287
Gln_432	M1	-0.0012	-0.0018	0.0007	0.0014	0.0007	0.0014
Gln_433	M2	0.0008	0	-0.0006	-0.0004	-0.001	-0.0012
Gln_434	M3	-0.0001	0.0009	0.0009	0.0003	0.0006	0.0007
Gln_435	M4	0.0068	0.0068	0.0119	0.0074	0.0026	0.0044
Gln_436	M5	0.3443	0.3504	0.3473	0.3636	0.3656	0.364
Cit_591	M0	0.8959	0.8964	0.9012	0.7166	0.7143	0.7122
Cit_592	M1	0.0058	0.0004	-0.0002	0.0169	0.0205	0.0156
Cit_593	M2	0.0063	0.0107	0.008	0.0268	0.0228	0.024
Cit_594	M3	0.0191	0.0175	0.0173	0.0373	0.0376	0.0396
Cit_595	M4	0.0626	0.0637	0.0605	0.1314	0.1389	0.1361
Cit_596	M5	0.0116	0.013	0.0137	0.0692	0.0685	0.0691
Cit_597	M6	-0.0001	-0.0005	0.0003	0.0038	0.0019	0.0068
Akg_346	M0	0.8703	0.8705	0.8712	0.7425	0.7487	0.7425
Akg_347	M1	0.0043	0.0024	0.0035	0.0026	-0.0006	0.0063
Akg_348	M2	0.0094	0.0117	0.0148	0.0112	0.0054	0.0085
Akg_349	M3	0.0171	0.0181	0.0157	0.0226	0.019	0.0183
Akg_350	M4	0.0043	0.0035	0.0012	0.0073	0.0091	0.0077
Akg_351	M5	0.0939	0.0917	0.0888	0.2053	0.2079	0.2082
