# Supplementary material for: Environmental cystine drives glutamine anaplerosis and sensitizes cancer cells to glutaminase inhibition
Source: eLife journal article supplement (doi:10.7554/elife.27713), 2017-08-15
Supplement: supp [file elife-27713-supp-v1.zip › elife_poa_e27713_Figure_2_Source_Data_2.xlsx]

## Sheet: Fig2Supp1B
Metabolite	Label	DMEM 1	DMEM 2	DMEM 3	Adult bovine serum 1	Adult bovine serum 2	Adult bovine serum 3	Adult bovine serum -> DMEM 1	Adult bovine serum -> DMEM 2	Adult bovine serum -> DMEM 3
Mal_419	M0	0.7915	0.7854	0.777	0.9017	0.8958	0.902	0.9176	0.9188	0.9163
Mal_420	M1	0.017	0.0192	0.0302	0.0006	0.0112	0.0117	0.0082	0.0101	0.0097
Mal_421	M2	0.0302	0.0351	0.0385	0.0304	0.0225	0.0218	0.0162	0.01	0.0095
Mal_422	M3	0.0199	0.0169	0.0175	0.0061	0.0049	0.006	0.0026	0.0079	0.0078
Mal_423	M4	0.1451	0.142	0.1391	0.0633	0.0685	0.0596	0.0569	0.0514	0.0565
Asp_418	M0	0.7915	0.815	0.7991	0.8944	0.8851	0.9027	0.9118	0.9306	0.9223
Asp_419	M1	0.0132	0.0053	0.0104	0.019	0.0178	0.0093	0.0118	-0.002	-0.0002
Asp_420	M2	0.0384	0.0345	0.0401	0.0177	0.0242	0.02	0.0188	0.0124	0.0215
Asp_421	M3	0.017	0.0171	0.0179	0.0099	0.0083	0.0067	0.006	0.0076	0.0072
Asp_422	M4	0.1375	0.1274	0.1325	0.0646	0.0664	0.062	0.054	0.0554	0.0518
Glu_432	M0	0.7734	0.7729	0.7744	0.883	0.8788	0.8879	0.9072	0.9063	0.9035
Glu_433	M1	0.0032	0.0041	0.0028	-0.0005	0.0023	-0.0003	-0.0051	-0.0043	-0.0017
Glu_434	M2	0.0051	0.0064	0.0068	0.0025	0.0018	0.0025	0.001	0.0015	0.0009
Glu_435	M3	0.0386	0.0392	0.0387	0.0243	0.0243	0.0226	0.0157	0.0147	0.0157
Glu_436	M4	0.009	0.0087	0.009	0.0046	0.0046	0.0043	0.004	0.0042	0.0038
Glu_437	M5	0.1715	0.1703	0.169	0.0867	0.0889	0.0839	0.0775	0.0781	0.0783
Gln_431	M0	0.6315	0.6383	0.5876	0.6144	0.6319	0.6328	0.6931	0.7051	0.7027
Gln_432	M1	-0.0049	-0.0199	0.0247	0.0197	0.0135	-0.0052	-0.0011	-0.0057	0.0053
Gln_433	M2	0.0406	0.0208	0.0293	0.0121	0.01	0.0147	0.0009	0.0036	0.0097
Gln_434	M3	-0.0347	-0.0066	-0.013	-0.0107	-0.0152	-0.0055	0.0013	0.0023	-0.0027
Gln_435	M4	0.003	0.0125	0.0028	0.0064	0.0057	0.0135	0.0081	0.009	0.0067
Gln_436	M5	0.3913	0.3525	0.3719	0.3602	0.3602	0.3463	0.2962	0.2846	0.2868
Akg_346	M0	0.7702	0.7366	0.7684	0.9368	0.9167	0.9178	0.9089	0.9101	0.9556
Akg_347	M1	0.023	0.0159	0.0061	-0.0042	0.0239	0.0122	0.0084	0.0185	0.0077
Akg_348	M2	-0.0073	0.0105	-0.001	-0.0056	0.0001	0.0019	0.0094	0.0013	-0.0074
Akg_349	M3	0.044	0.0399	0.0405	0.0253	0.0137	0.015	0.0098	0.0113	-0.0011
Akg_350	M4	0.0045	0.0071	0.008	-0.0056	-0.0068	0.0027	0.0005	0.0011	-0.0025
Akg_351	M5	0.1821	0.1938	0.1914	0.0657	0.065	0.0571	0.0644	0.0615	0.0612
