# Supplementary material for: Environmental cystine drives glutamine anaplerosis and sensitizes cancer cells to glutaminase inhibition
Source: eLife journal article supplement (doi:10.7554/elife.27713), 2017-08-15
Supplement: supp [file elife-27713-supp-v1.zip › elife_poa_e27713_Figure_3_Source_Data_1.xlsx]

## Sheet: Fig3A
Metabolite	Label	RPMI 1	RPMI 2	RPMI 3	Adult bovine serum 1	Adult bovine serum 2	Adult bovine serum 3	Adult bovine serum + RPMI nutrients 1	Adult bovine serum + RPMI nutrients 2	Adult bovine serum + RPMI nutrients 3	Adult bovine serum + RPMI amino acids 1	Adult bovine serum + RPMI amino acids 2	Adult bovine serum + RPMI amino acids 3	Adult bovine serum + RPMI cystine 1	Adult bovine serum + RPMI cystine 2	Adult bovine serum + RPMI cystine 3
Fum_287	M0	0.6986	0.7014	0.7015	0.8437	0.8372	0.8378	0.7476	0.7562	0.75	0.7301	0.7222	0.7337	0.741	0.7462	0.7573
Fum_288	M1	0.0014	0.0009	-0.0003	0.0025	0.0078	0.0039	0.0062	0.007	0.0071	0.0029	0.0088	0.0111	0.0115	0.0086	0.0067
Fum_289	M2	0.0272	0.027	0.0269	0.0331	0.031	0.0314	0.0402	0.0409	0.0425	0.047	0.0472	0.0389	0.045	0.0469	0.0446
Fum_290	M3	0.0663	0.066	0.0684	0.0156	0.0141	0.017	0.0264	0.0242	0.026	0.0271	0.0267	0.0258	0.0234	0.0187	0.0199
Fum_291	M4	0.197	0.196	0.1958	0.0995	0.1038	0.1054	0.1754	0.1691	0.1712	0.187	0.1906	0.1868	0.1734	0.1755	0.1678
Mal_419	M0	0.7172	0.7119	0.7146	0.8598	0.8552	0.8539	0.7557	0.7619	0.7668	0.7426	0.737	0.7458	0.7574	0.757	0.7666
Mal_420	M1	0.0009	0.0029	0.0027	0.0059	0.0075	0.0048	0.011	0.012	0.0067	0.0053	0.0103	0.0085	0.012	0.0163	0.0127
Mal_421	M2	0.0157	0.0183	0.0168	0.0201	0.017	0.0208	0.0329	0.0298	0.0322	0.0359	0.0356	0.0319	0.0359	0.0377	0.0355
Mal_422	M3	0.0662	0.0656	0.0675	0.013	0.0136	0.0137	0.0257	0.0241	0.026	0.0263	0.0265	0.027	0.0213	0.0203	0.0209
Mal_423	M4	0.2019	0.2017	0.1978	0.1016	0.1063	0.1054	0.1761	0.1714	0.1684	0.1898	0.1911	0.1869	0.1749	0.1693	0.1643
Asp_418	M0	0.7383	0.7448	0.7369	0.854	0.8534	0.8521	0.7809	0.7906	0.7956	0.7599	0.7536	0.7842	0.7536	0.7573	0.7595
Asp_419	M1	-0.0008	-0.0002	-0.0006	0.0051	0.0039	0.0035	0.0031	0.0053	0.0044	0.0069	0.0066	0.0032	0.0096	0.0062	0.0034
Asp_420	M2	0.019	0.0168	0.0186	0.0223	0.023	0.0241	0.0322	0.0305	0.0311	0.0347	0.0363	0.0297	0.0393	0.0409	0.0399
Asp_421	M3	0.0584	0.0569	0.0598	0.0121	0.0126	0.0134	0.023	0.0206	0.0201	0.0227	0.0238	0.0204	0.0207	0.0203	0.0212
Asp_422	M4	0.1869	0.1825	0.1882	0.1086	0.1082	0.1093	0.1634	0.1539	0.1502	0.178	0.1818	0.165	0.1801	0.1753	0.1767
Glu_432	M0	0.69	0.6924	0.6912	0.8394	0.8366	0.8368	0.7322	0.7357	0.7378	0.713	0.7149	0.7184	0.74	0.7421	0.7466
Glu_433	M1	0.0008	0.0001	0.0008	0.0045	0.0047	0.0063	0.005	0.0038	0.0042	0.0056	0.0041	0.005	0.0051	0.0042	0.0043
Glu_434	M2	0.0047	0.0048	0.0042	0.0051	0.0055	0.0048	0.0081	0.007	0.0076	0.0084	0.0075	0.0077	0.0073	0.0076	0.0072
Glu_435	M3	0.0141	0.0138	0.0138	0.0234	0.0226	0.0234	0.0354	0.0341	0.0347	0.0394	0.0403	0.0369	0.0423	0.0412	0.0392
Glu_436	M4	0.0111	0.0102	0.0109	0.0044	0.0047	0.0042	0.0082	0.0079	0.0077	0.0086	0.0083	0.0086	0.007	0.0072	0.0073
Glu_437	M5	0.2816	0.2812	0.2808	0.1238	0.1264	0.125	0.2121	0.2124	0.2092	0.2264	0.2265	0.2246	0.1988	0.1974	0.1958
Gln_431	M0	0.6447	0.6432	0.6411	0.5963	0.5959	0.5912	0.631	0.6305	0.6244	0.6327	0.6346	0.6394	0.6443	0.6436	0.6452
Gln_432	M1	0.0014	0.0017	0.0019	0.0025	-0.0012	0.0003	0.0002	0.0012	0.002	0.002	0.0001	0.0027	-0.0027	0.0049	-0.0009
Gln_433	M2	-0.0011	-0.0008	-0.0007	-0.0007	-0.0013	-0.0018	-0.0014	-0.0017	-0.0014	-0.0007	-0.0011	-0.0011	0.004	0.0015	0.0003
Gln_434	M3	0.0008	0.0004	0.0004	0.0008	0.0009	0.0025	0.0006	0.0009	0.0006	0.0005	0.0006	0.0002	0.0003	-0.0004	0.0021
Gln_435	M4	0.0021	0.0009	0.002	0.0136	0.0121	0.0132	0.0048	0.0059	0.0042	0.0032	0.0034	0.0012	0.0086	0.0103	0.0069
Gln_436	M5	0.3485	0.3505	0.3497	0.3834	0.388	0.3912	0.3625	0.3614	0.3597	0.3604	0.3602	0.3552	0.3426	0.3386	0.3388
Cit_591	M0	0.6884	0.6828	0.6846	0.8705	0.8674	0.8675	0.7786	0.7992	0.7938	0.7521	0.743	0.793	0.7962	0.8043	0.8185
Cit_592	M1	0.0122	0.0154	0.0152	0.0097	0.0058	0.0078	0.0111	0.0099	0.0151	0.0105	0.0118	0.0096	0.0129	0.0134	0.0145
Cit_593	M2	0.0328	0.0308	0.0302	0.0188	0.0214	0.0198	0.0326	0.0291	0.029	0.0373	0.0381	0.0277	0.0307	0.0303	0.0271
Cit_594	M3	0.044	0.0429	0.046	0.0133	0.013	0.015	0.0269	0.0233	0.0219	0.0285	0.0297	0.0242	0.0224	0.0198	0.0179
Cit_595	M4	0.1118	0.1076	0.1138	0.0713	0.0748	0.0732	0.1182	0.1077	0.1082	0.1365	0.1398	0.1137	0.1102	0.1068	0.0989
Cit_596	M5	0.1044	0.1109	0.1036	0.0149	0.0162	0.0153	0.0297	0.028	0.0298	0.0319	0.035	0.0282	0.0256	0.023	0.0209
Cit_597	M6	0.0068	0.01	0.0068	0.0006	0.0011	0.0011	0.0029	0.0025	0.0016	0.0023	0.0016	0.0021	0.0013	0.0014	0.0015
Akg_346	M0	0.6861	0.6916	0.69	0.9144	0.906	0.8918	0.7881	0.8015	0.8102	0.7595	0.7425	0.7996	0.7994	0.8127	0.8372
Akg_347	M1	0.0045	0.0057	0.0056	0.0038	0	0.0066	0.009	0.008	0.0052	0.0059	0.0189	0.0033	0.006	0.0039	0.0017
Akg_348	M2	0.0152	0.0131	0.0037	0.003	0.0041	0.0093	0.0088	0.0121	0.0091	0.0157	0.0083	0.0136	0.013	0.011	0.0103
Akg_349	M3	0.0122	0.0143	0.0161	0.0132	0.0147	0.0142	0.0279	0.0243	0.0263	0.0339	0.0349	0.026	0.0331	0.0299	0.0249
Akg_350	M4	0.01	0.0067	0.0037	0.0039	0.0019	0.0006	0.0068	0.0053	0.0035	0.0061	0.0045	0.003	0.0057	0.0052	0.0031
Akg_351	M5	0.2726	0.2629	0.275	0.0626	0.0726	0.0769	0.1586	0.1434	0.1432	0.1714	0.188	0.1486	0.1378	0.1328	0.1193
