# Supplementary material for: Environmental cystine drives glutamine anaplerosis and sensitizes cancer cells to glutaminase inhibition
Source: eLife journal article supplement (doi:10.7554/elife.27713), 2017-08-15
Supplement: supp [file elife-27713-supp-v1.zip › elife_poa_e27713_Figure_4_Source_Data_1.xlsx]

## Sheet: Fig4C
				A549 shGFP pLHCX empty vector						A549 shGFP pLHCX SLC7A11 shRNA res						A549 shSLC7A11 pLHCX empty vector						A549 shSLC7A11 pLHCX SLC7A11 shRNA res
Metabolite	Label	Adult bovine serum 1	Adult bovine serum 2	Adult bovine serum 3	Adult bovine serum + 208uM cystine 1	Adult bovine serum + 208uM cystine 2	Adult bovine serum + 208uM cystine 3	Adult bovine serum 1	Adult bovine serum 2	Adult bovine serum 3	Adult bovine serum + 208uM cystine 1	Adult bovine serum + 208uM cystine 2	Adult bovine serum + 208uM cystine 3	Adult bovine serum 1	Adult bovine serum 2	Adult bovine serum 3	Adult bovine serum + 208uM cystine 1	Adult bovine serum + 208uM cystine 2	Adult bovine serum + 208uM cystine 3	Adult bovine serum 1	Adult bovine serum 2	Adult bovine serum 3	Adult bovine serum + 208uM cystine 1	Adult bovine serum + 208uM cystine 2	Adult bovine serum + 208uM cystine 3
Fum_287	M0	0.8515	0.857	0.8585	0.761	0.7583	0.7483	0.8529	0.8503	0.8684	0.74	0.7456	0.7494	0.8067	0.8089	0.8103	0.7484	0.7583	0.7507	0.8198	0.8035	0.8122	0.7478	0.7602	0.7455
Fum_288	M1	0.0172	0.0145	0.0116	0.0351	0.0296	0.0307	0.0182	0.0174	0.0048	0.0321	0.0277	0.0317	0.0324	0.0237	0.0281	0.0408	0.0355	0.0417	0.0219	0.03	0.0293	0.038	0.0288	0.0368
Fum_289	M2	0.0373	0.0391	0.0417	0.0558	0.0556	0.0628	0.0342	0.0383	0.0332	0.0651	0.0645	0.0614	0.0418	0.05	0.0451	0.0573	0.0578	0.0548	0.0435	0.0481	0.0437	0.0623	0.0609	0.061
Fum_290	M3	0.0054	0.0069	0.0041	0.0121	0.0102	0.0099	0.0052	0.0041	0.0052	0.0107	0.0099	0.0103	0.0095	0.0089	0.011	0.0137	0.0107	0.0127	0.0102	0.0079	0.0066	0.0085	0.011	0.0103
Fum_291	M4	0.0602	0.0631	0.0617	0.1011	0.1129	0.1074	0.0614	0.0567	0.0574	0.1136	0.1152	0.1107	0.0677	0.0675	0.0696	0.0875	0.0891	0.0891	0.064	0.0732	0.0696	0.096	0.0939	0.098
Mal_419	M0	0.885	0.8866	0.8932	0.8023	0.7857	0.7867	0.8955	0.8932	0.9031	0.7894	0.7871	0.7834	0.8571	0.859	0.8463	0.7988	0.795	0.8006	0.8617	0.8545	0.8577	0.7983	0.7944	0.7937
Mal_420	M1	0.02	0.0186	0.0132	0.0255	0.0304	0.0371	0.0141	0.0127	0.0053	0.019	0.0289	0.0328	0.0213	0.0202	0.0331	0.0341	0.0402	0.0403	0.0208	0.0281	0.0237	0.0364	0.0334	0.038
Mal_421	M2	0.027	0.025	0.0259	0.0506	0.0562	0.0539	0.024	0.0322	0.0287	0.0579	0.0505	0.058	0.0419	0.0413	0.0418	0.0614	0.0583	0.0578	0.0392	0.0309	0.0381	0.0553	0.0574	0.0543
Mal_422	M3	0.0056	0.0049	0.0058	0.0094	0.0085	0.008	0.0088	0.0031	0.0046	0.0124	0.0123	0.0052	0.0091	0.0086	0.0084	0.0104	0.0114	0.0063	0.0076	0.0091	0.0083	0.01	0.0077	0.0092
Mal_423	M4	0.06	0.0642	0.0627	0.1139	0.1199	0.115	0.0584	0.0597	0.0605	0.1203	0.1244	0.1199	0.0727	0.0712	0.0699	0.0972	0.0979	0.0961	0.0713	0.0766	0.0709	0.0993	0.1038	0.1066
Asp_418	M0	0.8961	0.9029	0.9012	0.8376	0.8283	0.8468	0.905	0.9051	0.9077	0.8546	0.8348	0.8465	0.8705	0.8669	0.8693	0.8254	0.8464	0.834	0.8695	0.8676	0.8705	0.8171	0.7997	0.8077
Asp_419	M1	0.0116	0.0091	0.0134	0.0244	0.0185	0.0239	0.0099	0.0129	0.0131	0.0154	0.0318	0.0186	0.0225	0.0261	0.0216	0.0377	0.0241	0.0318	0.021	0.0199	0.0231	0.0328	0.044	0.0382
Asp_420	M2	0.0295	0.024	0.0253	0.0431	0.0496	0.0356	0.0234	0.0242	0.0232	0.0424	0.0369	0.0427	0.0353	0.0356	0.0352	0.0463	0.0423	0.0456	0.0346	0.0351	0.0342	0.0506	0.0519	0.043
Asp_421	M3	0.0049	0.0079	0.0045	0.0069	0.0078	0.0105	0.0046	0.0036	0.0038	0.0046	0.0105	0.0068	0.0068	0.0066	0.0068	0.0116	0.0088	0.0079	0.0074	0.0073	0.0047	0.0075	0.0046	0.0099
Asp_422	M4	0.0563	0.0547	0.0538	0.0917	0.0963	0.0858	0.058	0.0531	0.0522	0.0852	0.0871	0.0885	0.0645	0.0656	0.0675	0.0808	0.0828	0.0813	0.0664	0.0684	0.0661	0.0916	0.1014	0.1001
Glu_432	M0	0.8625	0.8592	0.8622	0.7643	0.7621	0.7653	0.8679	0.8702	0.8673	0.7612	0.7621	0.7619	0.822	0.8227	0.8234	0.7735	0.7695	0.7703	0.8381	0.8394	0.8364	0.7707	0.7693	0.7709
Glu_433	M1	0.0184	0.0213	0.0197	0.0272	0.026	0.0267	0.0159	0.0156	0.0173	0.0264	0.024	0.0241	0.0292	0.0272	0.0274	0.0369	0.0382	0.0383	0.0226	0.0223	0.0244	0.0316	0.0321	0.0314
Glu_434	M2	0.0092	0.01	0.0103	0.0164	0.0163	0.0153	0.009	0.0082	0.0089	0.0155	0.0146	0.0143	0.0148	0.0157	0.0143	0.0196	0.0202	0.0188	0.0135	0.0121	0.0117	0.0172	0.0183	0.0174
Glu_435	M3	0.0292	0.0297	0.0299	0.0547	0.0569	0.0552	0.0286	0.0282	0.0285	0.0556	0.0556	0.0559	0.0423	0.0417	0.0424	0.0573	0.0588	0.0578	0.0376	0.0396	0.0386	0.0572	0.0576	0.058
Glu_436	M4	0.0028	0.0029	0.0023	0.0044	0.0041	0.005	0.0023	0.0021	0.0023	0.0047	0.0048	0.0048	0.0029	0.0029	0.003	0.0036	0.004	0.0035	0.0029	0.0026	0.003	0.0041	0.0041	0.0042
Glu_437	M5	0.0786	0.0776	0.0762	0.1341	0.1357	0.1334	0.0769	0.0762	0.0763	0.1377	0.1402	0.1402	0.0895	0.0906	0.0906	0.1097	0.1102	0.112	0.0861	0.0847	0.0867	0.12	0.1195	0.119
Gln_431	M0	0.6452	0.651	0.6526	0.6442	0.6521	0.6501	0.648	0.6457	0.6455	0.6434	0.644	0.6434	0.6468	0.6428	0.6417	0.6466	0.6483	0.6425	0.6461	0.6415	0.6519	0.6329	0.6394	0.6422
Gln_432	M1	0	-0.0042	-0.0039	0.0028	-0.0002	-0.0015	-0.0037	-0.0025	-0.0022	0	0.0022	-0.0006	-0.0043	-0.0031	-0.0019	-0.0023	0.0007	-0.002	-0.0019	-0.002	-0.003	0.0061	0.0065	0
Gln_433	M2	0	-0.0003	0.0017	-0.0008	0.0004	0.0019	0.0004	-0.0014	0.0037	-0.0011	0	0.002	0.0008	0.0019	0.0011	0.002	-0.0033	0.0031	0.0007	0.002	-0.0005	-0.0012	-0.0015	-0.0016
Gln_434	M3	0.0001	0.0009	-0.0003	0.0021	0.003	-0.0001	-0.0005	0.0022	-0.0001	0.0024	0.0012	0.0003	0.0008	0.0002	0.0006	0.0007	0.0034	0.0015	0.0005	0.0009	0.0009	0.0012	0.0002	0.0021
Gln_435	M4	0.0132	0.0137	0.0122	0.0134	0.0119	0.009	0.0117	0.0112	0.0107	0.0125	0.0106	0.0135	0.0103	0.0142	0.0106	0.0075	0.0111	0.0129	0.0089	0.0087	0.0107	0.014	0.0103	0.0144
Gln_436	M5	0.3396	0.3385	0.3364	0.3331	0.3271	0.3391	0.341	0.3427	0.337	0.3385	0.3367	0.3375	0.3408	0.3395	0.346	0.3361	0.3348	0.3352	0.34	0.3458	0.3351	0.339	0.3387	0.334
Cit_591	M0	0.8991	0.8966	0.8955	0.8124	0.8026	0.8069	0.9081	0.9078	0.9058	0.7995	0.8045	0.8037	0.8663	0.8698	0.8664	0.8144	0.811	0.8141	0.8879	0.8679	0.8783	0.8187	0.8142	0.8093
Cit_592	M1	0.0182	0.0167	0.017	0.0286	0.029	0.0296	0.0119	0.0131	0.0133	0.0348	0.0287	0.0266	0.0265	0.0256	0.0271	0.0419	0.0428	0.0442	0.0157	0.0296	0.0217	0.0376	0.0371	0.0406
Cit_593	M2	0.0177	0.0199	0.0207	0.0425	0.0445	0.0449	0.0184	0.017	0.0213	0.0421	0.0439	0.0468	0.03	0.0291	0.0303	0.0457	0.0435	0.043	0.0237	0.0282	0.0272	0.0417	0.0404	0.0441
Cit_594	M3	0.009	0.0109	0.0109	0.0169	0.0179	0.0162	0.0084	0.01	0.0076	0.0167	0.0185	0.0156	0.013	0.0131	0.0109	0.0153	0.0165	0.0154	0.015	0.0103	0.0101	0.0123	0.0174	0.0147
Cit_595	M4	0.0526	0.0515	0.052	0.0904	0.0963	0.0931	0.0493	0.0481	0.0486	0.0962	0.0943	0.0978	0.0573	0.0572	0.0596	0.0743	0.0783	0.0736	0.0528	0.0579	0.058	0.082	0.0832	0.0824
Cit_596	M5	0.0036	0.0048	0.0039	0.0101	0.0098	0.0095	0.0036	0.0044	0.0037	0.0113	0.0096	0.0102	0.0069	0.005	0.0057	0.0081	0.0079	0.0108	0.0052	0.0068	0.0054	0.0078	0.0081	0.0101
Cit_597	M6	-0.0002	-0.0004	0.0001	-0.0012	0.0002	0	0.0008	-0.0003	-0.0005	0	0.0007	-0.0003	0.0007	0.0001	0.0003	0.0007	0.0004	-0.0012	0.0004	-0.0003	0.0002	0.0004	0.0002	-0.0007
Akg_346	M0	0.8994	0.8933	0.8874	0.7993	0.7856	0.7869	0.9018	0.9006	0.8994	0.7845	0.7863	0.7905	0.8549	0.859	0.8568	0.807	0.8012	0.7985	0.8874	0.8633	0.8816	0.819	0.8088	0.8049
Akg_347	M1	0.0076	0.0068	0.0101	0.0278	0.0221	0.0262	0.0137	0.0142	0.0131	0.0212	0.0271	0.0186	0.0205	0.0258	0.0238	0.0301	0.0307	0.0383	0.0136	0.0202	0.0073	0.0203	0.024	0.0266
Akg_348	M2	0.0088	0.0079	0.0114	0.0098	0.017	0.0153	0.0052	0.0057	0.0078	0.021	0.0127	0.0169	0.0154	0.012	0.0091	0.0179	0.0206	0.015	0.0118	0.0114	0.0143	0.0148	0.0161	0.0172
Akg_349	M3	0.026	0.0283	0.0274	0.0516	0.0524	0.0519	0.0219	0.0227	0.0233	0.056	0.0526	0.0525	0.0365	0.0341	0.0377	0.0519	0.0511	0.0543	0.0277	0.0352	0.0294	0.0467	0.0545	0.0506
Akg_350	M4	0.0025	0.0018	0.0022	0.0037	0.0069	0.0051	0.0032	0.0022	0.0025	-0.0002	0.0059	0.0051	0.0026	0.0022	0.0027	0.0043	0.0042	0.0017	0.0028	0.003	0.003	0.0045	0.0001	0.0032
Akg_351	M5	0.0567	0.0632	0.0623	0.1093	0.1187	0.116	0.0554	0.0558	0.0547	0.1178	0.1153	0.1183	0.0708	0.0688	0.0701	0.0891	0.0924	0.094	0.0582	0.0705	0.0629	0.0972	0.098	0.0973

## Sheet: Fig4F Cell lines xCT mRNA
Cell Line	SLC7A11 mRNA level (RMA, log2)
A549	11.1249
HCT116	8.62679
143B	9.30424
MDAMB231	8.93732
PC3	7.65956
NCIH1299	7.19174
TT	10.8533
MDAMB468	7.25197
CAL120	9.4696
ASPC1	10.2888
HS578T	9.83814
NCIH226	8.79103
NCIH1395	8.75817
MIAPACA2	7.19745
PANC1	6.95841
AU565	6.86252
BT474	5.89733
EVSAT	5.74796

## Sheet: Fig4F Tracing
				A549						HCT116						143B						MDAMB231						PC3					NCIH1299						TT						MDAMB468
Metabolite	Label	RPMI 208uM cystine 1	RPMI 208uM cystine 2	RPMI 208uM cystine 3	RPMI 10uM cystine 1	RPMI 10uM cystine 2	RPMI 10uM cystine 3	RPMI 208uM cystine 1	RPMI 208uM cystine 2	RPMI 208uM cystine 3	RPMI 10uM cystine 1	RPMI 10uM cystine 2	RPMI 10uM cystine 3	RPMI 208uM cystine 1	RPMI 208uM cystine 2	RPMI 208uM cystine 3	RPMI 10uM cystine 1	RPMI 10uM cystine 2	RPMI 10uM cystine 3	RPMI 208uM cystine 1	RPMI 208uM cystine 2	RPMI 208uM cystine 3	RPMI 10uM cystine 1	RPMI 10uM cystine 2	RPMI 10uM cystine 3	RPMI 208uM cystine 1	RPMI 208uM cystine 2	RPMI 10uM cystine 1	RPMI 10uM cystine 2	RPMI 10uM cystine 3	RPMI 208uM cystine 1	RPMI 208uM cystine 2	RPMI 208uM cystine 3	RPMI 10uM cystine 1	RPMI 10uM cystine 2	RPMI 10uM cystine 3	RPMI 208uM cystine 1	RPMI 208uM cystine 2	RPMI 208uM cystine 3	RPMI 10uM cystine 1	RPMI 10uM cystine 2	RPMI 10uM cystine 3	RPMI 208uM cystine 1	RPMI 208uM cystine 2	RPMI 208uM cystine 3	RPMI 10uM cystine 1	RPMI 10uM cystine 2	RPMI 10uM cystine 3	RPMI 208uM cystine 1
Fum_287	M0	0.7338	0.7351	0.7301	0.7993	0.8014	0.7993	0.7025	0.7037	0.7072	0.726	0.7276	0.7249	0.7269	0.7275	0.7252	0.7456	0.7477	0.7412	0.7728	0.7735	0.7681	0.7987	0.8025	0.8068	0.6728	0.6718	0.6992	0.6982	0.701	0.7084	0.7116	0.7167	0.7393	0.7347	0.7357	0.6979	0.6942	0.6953	0.7382	0.7431	0.7429	0.7215	0.7228	0.7241	0.7299	0.7323	0.7286	0.7092
Fum_288	M1	-0.0001	0.0008	0.0049	0.006	0.001	0.0034	0.0052	0.004	0.0031	0.0105	0.0084	0.0113	-0.0011	-0.0008	0	0.0023	0.0002	0.0019	0.0121	0.0114	0.0077	0.0169	0.0145	0.0071	0.0037	0.0056	0.003	0.0052	0.0043	0.0135	0.0092	0.0064	0.0122	0.014	0.0142	-0.0007	0.0051	0.0043	0.0046	0.0002	0.0037	0.0045	0.0031	0.0039	-0.0004	0.0005	0.0007	0.0028
Fum_289	M2	0.0263	0.0261	0.0278	0.0249	0.0292	0.0278	0.034	0.0344	0.0338	0.0432	0.0445	0.0436	0.0209	0.0208	0.0217	0.0231	0.0229	0.024	0.0366	0.0383	0.0404	0.0376	0.0421	0.038	0.0347	0.0344	0.0342	0.0354	0.0326	0.049	0.0468	0.0479	0.0525	0.0525	0.0497	0.0253	0.0255	0.0256	0.0307	0.0285	0.0283	0.0249	0.0251	0.0236	0.0216	0.0206	0.0216	0.0277
Fum_290	M3	0.0637	0.0648	0.0634	0.0478	0.0468	0.047	0.041	0.0409	0.0399	0.0292	0.0281	0.0304	0.0533	0.0519	0.0528	0.0455	0.0448	0.0459	0.0314	0.0322	0.0319	0.0233	0.0215	0.0253	0.0682	0.0662	0.0523	0.0517	0.0523	0.028	0.0278	0.0273	0.019	0.0211	0.0209	0.0672	0.0677	0.0677	0.0565	0.0575	0.0561	0.0763	0.0754	0.0753	0.0794	0.0783	0.0789	0.0716
Fum_291	M4	0.1715	0.1687	0.1676	0.1182	0.1175	0.1191	0.2133	0.2143	0.2111	0.1918	0.1894	0.1907	0.1963	0.1957	0.1967	0.1802	0.1811	0.1831	0.1496	0.1453	0.1507	0.1216	0.1213	0.1199	0.2161	0.2195	0.2067	0.2057	0.2067	0.1947	0.198	0.1938	0.1711	0.1725	0.1728	0.1679	0.1681	0.1637	0.1428	0.1461	0.1437	0.1681	0.1692	0.1693	0.166	0.1642	0.1663	0.1615
Mal_419	M0	0.7449	0.7479	0.7459	0.809	0.8108	0.8121	0.7183	0.7131	0.7132	0.7352	0.7384	0.7358	0.7392	0.73	0.7366	0.7554	0.7566	0.7544	0.7774	0.7753	0.7785	0.8075	0.814	0.814	0.6808	0.6819	0.7107	0.7103	0.7113	0.7243	0.7218	0.7202	0.7457	0.7474	0.7471	0.7343	0.7315	0.7322	0.7697	0.7716	0.7664	0.7357	0.7335	0.7346	0.7405	0.742	0.7388	0.7391
Mal_420	M1	0.0046	0.0027	0.0015	0.0058	0.0061	0.0056	0.0038	0.0076	0.0091	0.0124	0.0093	0.0115	-0.0005	0.0056	0.0009	0.0025	0.0038	0.005	0.0124	0.0133	0.0121	0.0169	0.0154	0.0123	0.0051	0.0057	0.004	0.004	0.006	0.0083	0.0116	0.0115	0.0139	0.0112	0.0128	-0.0025	-0.0014	-0.0015	-0.0023	-0.003	0.0029	0.0012	0.0028	0.004	0.0001	-0.0001	0.0013	0.002
Mal_421	M2	0.0184	0.0174	0.0202	0.0172	0.0189	0.0156	0.0245	0.0252	0.0239	0.0355	0.0331	0.0343	0.0124	0.0132	0.0129	0.0149	0.0147	0.014	0.0285	0.0322	0.0318	0.0324	0.0265	0.03	0.0257	0.0261	0.0259	0.0261	0.0222	0.0421	0.0386	0.0434	0.0432	0.0443	0.0412	0.021	0.0208	0.0243	0.0223	0.024	0.0217	0.0172	0.0175	0.0144	0.013	0.0129	0.0144	0.0191
Mal_422	M3	0.0617	0.0616	0.062	0.0484	0.0442	0.0468	0.0399	0.0394	0.0394	0.0289	0.0304	0.0286	0.0524	0.0525	0.0522	0.0444	0.0448	0.0454	0.0323	0.0317	0.0298	0.0242	0.0263	0.0262	0.0686	0.0663	0.0533	0.0544	0.053	0.0286	0.026	0.0276	0.0222	0.0214	0.021	0.0689	0.0686	0.0693	0.0593	0.0567	0.056	0.0769	0.0754	0.0762	0.0796	0.079	0.0798	0.0716
Mal_423	M4	0.1725	0.1714	0.17	0.1203	0.1203	0.1184	0.2151	0.2143	0.2146	0.1863	0.1891	0.1897	0.195	0.1997	0.1985	0.1833	0.1809	0.1819	0.1508	0.1467	0.1469	0.119	0.1164	0.1176	0.2194	0.2217	0.2077	0.2066	0.2087	0.1974	0.2016	0.1985	0.1753	0.1754	0.1796	0.1759	0.1833	0.1737	0.153	0.1513	0.1529	0.1696	0.1722	0.1716	0.1676	0.1668	0.1661	0.168
Asp_418	M0	0.7686	0.7776	0.7596	0.8193	0.8206	0.8229	0.7417	0.7767	0.7679	0.7683	0.7917	0.7644	0.7415	0.7431	0.7448	0.764	0.7764	0.763	0.7945	0.8054	0.8093	0.827	0.8269	0.8368	0.6894	0.6942	0.7222	0.723	0.7253	0.732	0.728	0.7309	0.754	0.7564	0.7503	0.7467	0.7492	0.7432	0.7794	0.7786	0.7794	0.7593	0.7562	0.7697	0.7603	0.7685	0.7655	0.745
Asp_419	M1	0.0004	0.0011	-0.0007	-0.0003	0.0019	0.0002	0.0033	0.0001	0.0019	0.0068	0.0017	0.0056	-0.0008	-0.0012	-0.0011	0.0002	-0.001	0.0016	0.0081	0.0084	0.01	0.0107	0.0135	0.0119	0.0078	0.0056	0.0059	0.0056	0.0054	0.0091	0.0075	0.0085	0.0111	0.012	0.0125	-0.0007	-0.0029	0.0015	-0.0001	-0.0005	0.0005	0.0007	-0.0008	-0.0006	-0.002	-0.0008	-0.0007	0.0028
Asp_420	M2	0.0187	0.0196	0.0225	0.0206	0.0207	0.0204	0.0261	0.0242	0.0252	0.0342	0.0314	0.0338	0.0168	0.0165	0.016	0.0177	0.0175	0.0165	0.0358	0.0338	0.032	0.0355	0.035	0.0329	0.0339	0.0336	0.0308	0.0309	0.0307	0.0408	0.0398	0.0415	0.0427	0.0396	0.0441	0.0188	0.0205	0.0203	0.0214	0.0209	0.0221	0.0142	0.0164	0.0145	0.0127	0.014	0.0123	0.0222
Asp_421	M3	0.0553	0.0526	0.0567	0.0437	0.041	0.0417	0.0361	0.0305	0.0306	0.0237	0.0234	0.0263	0.0488	0.0493	0.0484	0.0399	0.0385	0.0401	0.0242	0.0225	0.022	0.0187	0.0184	0.0166	0.054	0.0537	0.0423	0.0431	0.042	0.0263	0.0264	0.0269	0.02	0.0211	0.0198	0.065	0.0638	0.0644	0.0545	0.0551	0.0538	0.0728	0.0725	0.0673	0.0754	0.0707	0.0719	0.071
Asp_422	M4	0.1597	0.1507	0.1647	0.118	0.118	0.1163	0.1955	0.1708	0.1772	0.1694	0.1543	0.1733	0.1964	0.1949	0.194	0.1805	0.1715	0.1822	0.1395	0.1315	0.1278	0.1102	0.1068	0.1035	0.2168	0.2148	0.2007	0.1992	0.1983	0.1938	0.2006	0.194	0.1735	0.1717	0.174	0.172	0.1708	0.1715	0.1457	0.1472	0.1454	0.1541	0.1572	0.1506	0.1542	0.1482	0.1521	0.1605
Glu_432	M0	0.7066	0.7069	0.7069	0.7674	0.7695	0.7698	0.6852	0.689	0.6877	0.704	0.7088	0.7094	0.6892	0.6911	0.6895	0.7112	0.7134	0.7141	0.729	0.7313	0.7286	0.7712	0.7713	0.7726	0.6587	0.6592	0.687	0.6866	0.69	0.6758	0.679	0.6769	0.7039	0.7099	0.6958	0.7009	0.7034	0.7018	0.7394	0.7397	0.7392	0.6972	0.6998	0.7027	0.7029	0.7057	0.7024	0.6895
Glu_433	M1	0.0039	0.0027	0.0027	0.0089	0.0077	0.0078	0.0059	0.0067	0.0059	0.0105	0.0088	0.0075	0.0106	0.0097	0.0106	0.0118	0.0123	0.0115	0.0082	0.0081	0.0101	0.0122	0.0115	0.0119	0.008	0.0085	0.0086	0.0085	0.0071	0.0187	0.016	0.0181	0.0194	0.0148	0.0225	0.0042	0.0039	0.0044	0.0078	0.0077	0.0074	0.0086	0.0066	0.0059	0.0077	0.0059	0.0082	0.0099
Glu_434	M2	0.0057	0.0058	0.0055	0.0077	0.0077	0.0074	0.0065	0.0071	0.0072	0.0113	0.0104	0.0108	0.0053	0.0047	0.0049	0.0055	0.0052	0.0053	0.0098	0.0097	0.0104	0.0113	0.0118	0.0115	0.0088	0.0089	0.0084	0.0087	0.0081	0.0128	0.0118	0.0124	0.014	0.0131	0.0147	0.0051	0.005	0.0052	0.0066	0.006	0.0068	0.0067	0.0066	0.0067	0.0053	0.0055	0.0049	0.0074
Glu_435	M3	0.0144	0.0141	0.0147	0.0148	0.0147	0.0145	0.023	0.0231	0.0228	0.0317	0.0305	0.0315	0.0132	0.013	0.0131	0.0155	0.0152	0.0154	0.0354	0.0342	0.0345	0.035	0.0354	0.0346	0.0235	0.0244	0.0233	0.0238	0.0225	0.0396	0.0379	0.0391	0.042	0.0401	0.0412	0.015	0.0154	0.0163	0.0169	0.0167	0.0172	0.0137	0.0134	0.0128	0.0098	0.0098	0.0096	0.0167
Glu_436	M4	0.0032	0.0058	0.0042	0.008	0.0079	0.0081	0.0094	0.0043	0.0109	0.0097	0.0096	0.0092	-0.0111	-0.0112	-0.0113	-0.0059	-0.0091	-0.0094	0.0083	0.0083	0.0087	0.0065	0.0065	0.0063	0.012	0.0118	0.0107	0.0106	0.0107	0.0099	0.0097	0.0098	0.0083	0.0085	0.0086	0.0102	0.0103	0.01	0.0085	0.0085	0.0086	0.0103	0.0102	0.01	0.0102	0.01	0.0103	0.0102
Glu_437	M5	0.2671	0.265	0.2669	0.1939	0.1932	0.1931	0.2707	0.2699	0.2664	0.2337	0.2324	0.2327	0.2923	0.2921	0.2927	0.2618	0.2629	0.2628	0.2105	0.2099	0.2087	0.1648	0.1643	0.164	0.2899	0.2882	0.2627	0.2624	0.2628	0.2433	0.2461	0.2438	0.2132	0.2146	0.2172	0.2655	0.2632	0.2631	0.2215	0.222	0.2217	0.2638	0.2643	0.2629	0.2653	0.2639	0.2654	0.2667
Gln_431	M0	0.6673	0.6638	0.6666	0.6751	0.6747	0.6737	0.665	0.6617	0.6655	0.6713	0.6716	0.6715	0.6601	0.6638	0.662	0.6689	0.6675	0.6694	0.6717	0.6623	0.6687	0.6704	0.6774	0.6768	0.6466	0.6469	0.6654	0.6634	0.664	0.6642	0.6659	0.6657	0.6721	0.673	0.6707	0.669	0.6694	0.6705	0.6745	0.6732	0.671	0.6712	0.6715	0.6724	0.6723	0.673	0.6734	0.6698
Gln_432	M1	0.0041	0.0072	0.0052	0.0026	0.0025	0.0018	0.0062	0.0095	0.0063	0.0061	0.0064	0.0052	0.0096	0.0076	0.0084	0.0084	0.0077	0.008	-0.0009	0.0046	0.0017	0.0026	0.0027	0.0029	0.0024	0.0029	0.0008	0.003	0.0013	0.0028	0.0006	0.0023	-0.0016	-0.0015	-0.0006	-0.0006	-0.002	-0.0008	-0.0017	-0.0019	-0.001	-0.001	-0.0025	-0.0028	0.0001	-0.0001	-0.0014	-0.0013
Gln_433	M2	-0.001	-0.0007	-0.0007	-0.001	-0.0011	0.0002	0.0001	-0.0003	0.0001	-0.0008	-0.0012	-0.0011	-0.0001	-0.0005	0	-0.0007	0	-0.0007	-0.0017	-0.0006	-0.0016	-0.001	-0.0014	-0.0019	-0.0009	-0.0008	-0.001	-0.0011	-0.001	0.0004	0.0001	-0.0005	-0.001	-0.0009	-0.0004	-0.0008	-0.0005	-0.0011	-0.0009	0.0006	0	-0.0008	-0.0003	-0.0006	-0.0006	-0.0001	0.0002	-0.0007
Gln_434	M3	0.0006	0	-0.0001	0.0004	0.0005	0.0002	0.0002	0.0001	0.0002	0.0003	0.0003	0.0001	0.0001	0.0005	0.0002	0.0004	0.0001	0.0001	0.0014	0.0006	0.001	0.0007	0.0008	0.0005	0.0009	0.001	0.0012	0.0007	0.0009	0.0001	0.0003	0.0003	0.0008	0.001	0.0005	0.0003	0.0005	0.0007	0.0005	0.0004	0.0004	0.0009	0.001	0.0012	0.0006	0.0004	0.0005	0.0011
Gln_435	M4	-0.003	-0.0055	-0.0058	-0.0054	-0.0051	-0.003	-0.0063	-0.0061	-0.0056	-0.0054	-0.0058	-0.0032	-0.0055	-0.0065	-0.0063	-0.0063	-0.0057	-0.0055	0.0043	-0.0015	0.0005	-0.0004	-0.0028	-0.0044	0.0016	0.0016	0.0025	0.0015	0.0031	0.0117	0.0123	0.0122	0.0121	0.0117	0.0119	0.0121	0.0119	0.0119	0.0118	0.0112	0.0117	0.0118	0.0121	0.0117	0.0117	0.0115	0.01	0.0114
Gln_436	M5	0.327	0.3301	0.3293	0.3201	0.3204	0.32	0.3314	0.3318	0.3296	0.3244	0.3243	0.3226	0.3314	0.3306	0.3311	0.325	0.3259	0.3248	0.3201	0.3223	0.3219	0.3152	0.3202	0.3175	0.3439	0.3429	0.3255	0.3263	0.3246	0.3219	0.3217	0.3201	0.3186	0.3188	0.3196	0.3218	0.3225	0.3208	0.317	0.3189	0.3203	0.3196	0.3203	0.3194	0.3166	0.3163	0.3183	0.3202
Cit_591	M0	0.7211	0.717	0.7129	0.7858	0.7848	0.7893	0.6975	0.6963	0.7029	0.7162	0.7152	0.7098	0.7269	0.7259	0.7308	0.7402	0.7584	0.7498	0.7806	0.7823	0.7763	0.8127	0.814	0.8117	0.6779	0.6722	0.7092	0.7108	0.7156	0.714	0.7085	0.7093	0.7386	0.738	0.7392	0.7481	0.7399	0.7317	0.77	0.7809	0.7746	0.7428	0.7361	0.7457	0.7566	0.7466	0.7474	0.7424
Cit_592	M1	0.0177	0.0228	0.0232	0.0205	0.0185	0.0194	0.0165	0.0172	0.0147	0.0207	0.0179	0.0216	0.011	0.0108	0.0108	0.0165	0.0065	0.0116	0.016	0.0164	0.0166	0.0242	0.0272	0.0268	0.0185	0.0309	0.0231	0.0229	0.0181	0.0116	0.0143	0.0159	0.0241	0.0182	0.0145	-0.004	0.0149	0.0131	0.002	-0.0054	-0.0001	0.01	0.0105	0.005	-0.003	0.0124	0.0116	0.0035
Cit_593	M2	0.0236	0.0225	0.0225	0.0223	0.0241	0.025	0.0362	0.0405	0.0387	0.0507	0.0562	0.0499	0.0117	0.0088	0.0068	0.0171	0.0159	0.0105	0.0322	0.0343	0.0376	0.0294	0.0257	0.027	0.041	0.0406	0.0387	0.0323	0.0402	0.0522	0.0547	0.0504	0.0498	0.0505	0.0522	0.0194	0.007	0.0182	0.0229	0.0183	0.0267	0.0213	0.028	0.0267	0.0267	0.0203	0.02	0.0286
Cit_594	M3	0.0472	0.0487	0.0485	0.0361	0.0392	0.0342	0.0389	0.0385	0.0386	0.0275	0.0314	0.0362	0.0451	0.0464	0.0482	0.0373	0.0376	0.0388	0.0326	0.0337	0.028	0.0264	0.0231	0.0277	0.032	0.0308	0.0282	0.0332	0.0232	0.0318	0.0273	0.0287	0.0215	0.0241	0.0201	0.0492	0.0538	0.0421	0.0385	0.0434	0.0351	0.0347	0.0324	0.0356	0.0278	0.0266	0.0305	0.0451
Cit_595	M4	0.1047	0.1061	0.1096	0.0771	0.0726	0.0763	0.1814	0.1783	0.1766	0.1618	0.1545	0.16	0.1657	0.1722	0.1717	0.1574	0.152	0.16	0.1221	0.1135	0.1229	0.0919	0.0951	0.0911	0.1224	0.128	0.1161	0.1141	0.1098	0.1818	0.1848	0.1881	0.1605	0.1652	0.1683	0.1097	0.1089	0.1139	0.0921	0.0955	0.0939	0.0756	0.074	0.0722	0.0633	0.0649	0.0632	0.1207
Cit_596	M5	0.0851	0.078	0.0826	0.0568	0.0604	0.0556	0.0234	0.0246	0.0221	0.017	0.0206	0.0169	0.0355	0.0319	0.0305	0.0317	0.0302	0.0285	0.0156	0.0203	0.017	0.0151	0.014	0.0157	0.1007	0.0938	0.0836	0.0862	0.0932	0.006	0.0067	0.0034	0.0038	0.0031	0.0049	0.0815	0.0764	0.0862	0.0803	0.0738	0.0697	0.1145	0.1185	0.1158	0.1284	0.1312	0.1256	0.0603
Cit_597	M6	0.0024	0.0049	0.0026	0.0027	0.0032	0.0031	0.0079	0.0069	0.0081	0.0085	0.005	0.0068	0.0015	0.0014	0.0022	0.0014	0.0033	0.0021	0.0023	0.0019	0.0034	0.0023	0.0031	0.0019	0.0078	0.007	0.0049	0.0059	0.0037	0.002	0.0063	0.0042	0.0033	0.0015	0.001	0.0001	0.0047	-0.0001	-0.0015	-0.0009	0.0051	0.0015	0.0025	0.001	0.0008	0	0.0036	-0.0014
Akg_346	M0	0.7179	0.7201	0.7168	0.7995	0.7996	0.787	0.6997	0.698	0.699	0.7199	0.7178	0.7261	0.7052	0.7099	0.7116	0.7347	0.7409	0.7293	0.7173	0.7209	0.7257	0.7662	0.779	0.7692	0.6764	0.6698	0.7065	0.6984	0.7019	0.7005	0.7053	0.699	0.7356	0.7266	0.7212	0.7074	0.7002	0.7151	0.7493	0.7465	0.7503	0.7075	0.7085	0.7101	0.7099	0.7133	0.7127	0.7129
Akg_347	M1	0.0029	-0.0043	-0.0002	0.0003	-0.0013	0.0044	0.001	0.0022	0.0027	0.0052	0.0067	-0.0001	-0.0022	-0.0029	0.002	-0.0009	-0.0065	0.0028	0.0154	0.019	0.0103	0.0148	0.0118	0.0072	0.0012	0.0038	-0.0009	0.0007	-0.0017	0.0092	0.0028	0.0093	0.0049	0.0128	0.0081	0.0062	0.0181	0.0038	0.0063	0.0099	0.0098	-0.0014	-0.0008	-0.0015	0.0003	-0.0027	0.0016	-0.0014
Akg_348	M2	0.005	0.0086	0.0043	0.0075	0.0068	0.0114	0.0078	0.0105	0.0083	0.0121	0.0139	0.0112	0.0038	0.0009	0.0004	0.0029	0.0035	0.0045	0.0178	0.0121	0.0133	0.0137	0.0118	0.0178	0.0103	0.0107	0.0061	0.0112	0.0123	0.0094	0.0112	0.0114	0.0112	0.0102	0.0155	0.0019	0	0.0035	0.0073	0.008	0.0025	0.0068	0.0046	0.0051	0.0034	0.0046	0.0034	0.0035
Akg_349	M3	0.0196	0.0202	0.0187	0.0165	0.0163	0.0153	0.024	0.0235	0.0241	0.0329	0.0316	0.0336	0.0138	0.015	0.0123	0.0146	0.0142	0.0164	0.0367	0.0371	0.0355	0.0363	0.0352	0.0373	0.0191	0.0207	0.0226	0.0208	0.0206	0.0425	0.04	0.042	0.0448	0.0408	0.0437	0.0166	0.0126	0.0128	0.0178	0.0155	0.0174	0.015	0.015	0.015	0.0108	0.0112	0.0095	0.0194
Akg_350	M4	0.0072	0.0072	0.0099	0.0063	0.0076	0.0083	0.0067	0.0087	0.0105	0.0092	0.0097	0.0091	0.0077	0.0071	0.0032	0.0084	0.0036	0.0021	0.0063	0.0036	0.0063	0.0042	0.0029	0.0057	0.0085	0.005	0.0074	0.0079	0.0104	0.0072	0.0082	0.0074	0.0095	0.0066	0.0074	0.01	0.009	0.0052	0.0064	0.0042	0.0088	0.0102	0.0098	0.0089	0.0099	0.0091	0.0102	0.0097
Akg_351	M5	0.2446	0.2473	0.2437	0.1676	0.1677	0.1706	0.2625	0.256	0.2541	0.2201	0.2217	0.2189	0.2723	0.2697	0.2719	0.2398	0.2417	0.242	0.1965	0.1997	0.2035	0.1632	0.1589	0.1578	0.2789	0.286	0.2569	0.2594	0.2533	0.234	0.2325	0.2328	0.1969	0.2069	0.2019	0.261	0.2613	0.2581	0.211	0.2192	0.2121	0.263	0.2626	0.2633	0.2651	0.2654	0.2622	0.2573
[truncated: 57 more columns]

## Sheet: Fig4G Cell lines CB839 sens
Cell Line	SLC7A11 mRNA level (RMA, log2)	CB-839 sensitive/resistant (IC50<1uM/IC50>1uM)
AU565	6.86252	resistant
DU4475	9.31245	resistant
HCC1187	6.58228	resistant
HCC1428	6.33276	resistant
HCC1937	7.37555	resistant
HCC1954	7.16991	resistant
HS343T	9.57967	resistant
HS739T	9.84076	resistant
MDAMB468	7.25197	resistant
SKBR3	6.6014	resistant
T47D	6.37262	resistant
BT20	8.3374	sensitive
HMC18	9.17576	sensitive
HCC38	8.74093	sensitive
BT549	6.93863	sensitive
MCF7	8.67179	sensitive
BT20	8.3374	sensitive
MDAMB231	8.93732	sensitive
HCC70	8.16796	sensitive
HCC1806	9.89979	sensitive
HS578T	9.83814	sensitive

## Sheet: Fig4I
				MCF7 empty vector						MCF7 SLC7A11						AU565 empty vector						AU565 SLC7A11						MDAMB468 empty vector						MDAMB468 SLC7A11
Metabolite	Label	RPMI 208uM cystine 1	RPMI 208uM cystine 2	RPMI 208uM cystine 3	RPMI 10uM cystine 1	RPMI 10uM cystine 2	RPMI 10uM cystine 3	RPMI 208uM cystine 1	RPMI 208uM cystine 2	RPMI 208uM cystine 3	RPMI 10uM cystine 1	RPMI 10uM cystine 2	RPMI 10uM cystine 3	RPMI 208uM cystine 1	RPMI 208uM cystine 2	RPMI 208uM cystine 3	RPMI 10uM cystine 1	RPMI 10uM cystine 2	RPMI 10uM cystine 3	RPMI 208uM cystine 1	RPMI 208uM cystine 2	RPMI 208uM cystine 3	RPMI 10uM cystine 1	RPMI 10uM cystine 2	RPMI 10uM cystine 3	RPMI 208uM cystine 1	RPMI 208uM cystine 2	RPMI 208uM cystine 3	RPMI 10uM cystine 1	RPMI 10uM cystine 2	RPMI 10uM cystine 3	RPMI 208uM cystine 1	RPMI 208uM cystine 2	RPMI 208uM cystine 3	RPMI 10uM cystine 1	RPMI 10uM cystine 2	RPMI 10uM cystine 3
Fum_287	M0	0.7329	0.7333	0.7311	0.7452	0.7448	0.7466	0.7652	0.7684	0.7845	0.8543	0.852	0.8491	0.7389	0.7392	0.739	0.7473	0.7514	0.746	0.7818	0.7872	0.7857	0.8481	0.846	0.8525	0.7444	0.7414	0.7429	0.7565	0.754	0.7557	0.7677	0.7783	0.7702	0.8842	0.8806	0.8863
Fum_288	M1	0.0131	0.0144	0.0139	0.0096	0.0104	0.0105	0.0032	0.0023	0.0014	0.0027	0.0002	0.0019	0.0157	0.0147	0.0138	0.0115	0.0087	0.0127	0.0083	0.0074	0.0044	0.0075	0.0083	0.0048	0.0018	0.0029	0.0034	-0.0012	0.0024	0.0002	-0.0007	-0.002	0.0035	-0.0004	0	-0.0012
Fum_289	M2	0.0521	0.0531	0.0525	0.0487	0.0486	0.0469	0.0305	0.0307	0.0288	0.0225	0.0247	0.0232	0.0498	0.051	0.0506	0.0477	0.0491	0.0503	0.0375	0.0342	0.0372	0.0296	0.0287	0.0298	0.0235	0.0221	0.0234	0.0199	0.0193	0.0184	0.021	0.0262	0.0227	0.016	0.0181	0.0158
Fum_290	M3	0.1049	0.1045	0.1052	0.1061	0.1049	0.1075	0.1059	0.1054	0.0971	0.0697	0.069	0.0691	0.0797	0.0824	0.0813	0.0815	0.0801	0.0808	0.0554	0.0569	0.058	0.0388	0.0406	0.0387	0.0675	0.068	0.0673	0.0661	0.0681	0.0671	0.0432	0.0409	0.0425	0.0294	0.0281	0.0283
Fum_291	M4	0.0942	0.0926	0.0961	0.0889	0.0893	0.0846	0.0967	0.0971	0.0831	0.0484	0.0521	0.0522	0.1114	0.1092	0.1129	0.109	0.1085	0.1077	0.1133	0.1098	0.1105	0.0749	0.0751	0.0754	0.1602	0.1612	0.1596	0.1555	0.1529	0.1553	0.1637	0.1506	0.1591	0.0708	0.0693	0.0688
Mal_419	M0	0.7396	0.743	0.7434	0.7549	0.7568	0.7556	0.7742	0.776	0.7966	0.8619	0.865	0.8651	0.7542	0.7531	0.753	0.7606	0.7588	0.7595	0.7979	0.7971	0.7957	0.8619	0.8607	0.8624	0.7559	0.7577	0.7521	0.7635	0.7666	0.77	0.7887	0.7885	0.7855	0.8947	0.8907	0.8975
Mal_420	M1	0.014	0.012	0.0127	0.0101	0.0105	0.0123	0.0015	0.0026	0.0011	0.0053	0.0026	0.0026	0.0117	0.0123	0.0139	0.0129	0.0148	0.0152	0.0093	0.0098	0.0083	0.0042	0.0046	0.0033	0.0018	0.0032	0.0072	0.0009	0.0008	0	0.0001	0.0086	0.0059	0.0038	0.0051	0.0001
Mal_421	M2	0.0434	0.0444	0.0429	0.0407	0.0354	0.036	0.0229	0.0221	0.0186	0.0111	0.0121	0.0107	0.0429	0.0431	0.0395	0.0389	0.0376	0.0368	0.0217	0.0264	0.0262	0.0187	0.0174	0.0199	0.0134	0.0117	0.0128	0.0104	0.0088	0.0083	0.0118	0.0062	0.0085	0.0022	0.0046	0.0037
Mal_422	M3	0.1072	0.1051	0.1078	0.1062	0.1087	0.109	0.1072	0.1066	0.0978	0.0708	0.0686	0.0707	0.0797	0.0806	0.0829	0.079	0.0789	0.0797	0.0585	0.055	0.0582	0.0397	0.0403	0.0381	0.0676	0.0668	0.0666	0.0677	0.0683	0.0674	0.0427	0.045	0.0442	0.0253	0.0254	0.0265
Mal_423	M4	0.0957	0.0955	0.0935	0.0878	0.0878	0.0866	0.0944	0.0937	0.0861	0.0506	0.0515	0.0513	0.1117	0.1109	0.1111	0.1092	0.1108	0.1082	0.1141	0.1125	0.111	0.0746	0.0766	0.0762	0.1616	0.1615	0.1623	0.1584	0.1557	0.1554	0.1562	0.1531	0.1545	0.0721	0.0728	0.0724
Asp_418	M0	0.7697	0.7672	0.773	0.7897	0.7781	0.779	0.8093	0.8209	0.8021	0.8619	0.8687	0.8646	0.8053	0.7797	0.8102	0.8181	0.8127	0.8198	0.8472	0.8515	0.86	0.9006	0.8985	0.8828	0.7849	0.7945	0.783	0.8012	0.8101	0.7998	0.9328	0.9344	0.9219	0.9559	0.9283	0.944
Asp_419	M1	0.0103	0.014	0.0133	0.0099	0.0109	0.01	0.0021	-0.0051	0.0047	-0.0002	0.0011	-0.0005	0.0053	0.0115	0.0086	0.0043	0.007	0.006	0.0051	0	-0.0031	-0.0064	-0.0011	0.0036	-0.0022	-0.0008	-0.0006	-0.0005	-0.0069	-0.0012	-0.0017	-0.0019	0.0018	-0.005	-0.0073	-0.0047
Asp_420	M2	0.0457	0.0452	0.0434	0.0386	0.0385	0.0395	0.0273	0.0277	0.0307	0.0177	0.0167	0.0183	0.0398	0.0419	0.0361	0.0373	0.0353	0.0332	0.0224	0.0234	0.0205	0.02	0.0197	0.0204	0.016	0.0118	0.0137	0.011	0.0133	0.0113	0.0026	0.009	0.0077	0.0053	0.0107	0.0087
Asp_421	M3	0.0915	0.0912	0.0882	0.0875	0.0935	0.0923	0.0852	0.0829	0.0841	0.0677	0.0618	0.0643	0.0618	0.0669	0.0592	0.0557	0.0623	0.0575	0.0413	0.0412	0.0383	0.0292	0.0271	0.0308	0.0588	0.0572	0.0608	0.0554	0.0545	0.0569	0.0159	0.014	0.0157	0.008	0.0187	0.011
Asp_422	M4	0.0832	0.0835	0.0831	0.0753	0.0801	0.0803	0.0783	0.0747	0.0794	0.054	0.0529	0.0538	0.0896	0.1014	0.0871	0.0855	0.0846	0.0844	0.0848	0.0868	0.0855	0.0579	0.0562	0.0632	0.1429	0.139	0.1457	0.1349	0.1283	0.1337	0.0518	0.0471	0.0584	0.0346	0.048	0.0433
Glu_432	M0	0.714	0.7143	0.7161	0.7355	0.7335	0.7344	0.7213	0.7213	0.7204	0.8251	0.8207	0.8235	0.7123	0.7103	0.7128	0.7261	0.7241	0.7255	0.7318	0.7316	0.7331	0.8194	0.8171	0.8183	0.7151	0.7197	0.7169	0.7274	0.7283	0.7252	0.7419	0.7456	0.741	0.8674	0.8625	0.8597
Glu_433	M1	0.0101	0.0099	0.0114	0.0094	0.0084	0.0089	-0.0007	0.0003	-0.0019	-0.0004	0.0016	-0.0002	0.0083	0.0087	0.0085	0.0069	0.0081	0.0084	0.0021	0.0018	0.0019	0.0022	0.0024	0.001	0.0001	-0.0012	-0.0008	-0.0025	-0.001	-0.0005	-0.0026	-0.0058	-0.0037	-0.0046	-0.0039	-0.0024
Glu_434	M2	0.0224	0.0224	0.0215	0.0199	0.0201	0.0197	0.0079	0.0079	0.0086	0.0064	0.0063	0.0057	0.0192	0.0198	0.0196	0.0188	0.0188	0.0184	0.0099	0.0104	0.0095	0.0067	0.008	0.0083	0.0047	0.0045	0.0052	0.003	0.003	0.0033	0.0016	0.0017	0.0016	0.0007	0.0023	0.0016
Glu_435	M3	0.0372	0.0383	0.0377	0.0317	0.0324	0.0318	0.0185	0.0183	0.0191	0.012	0.0114	0.0122	0.0405	0.0424	0.0402	0.038	0.0391	0.0383	0.0278	0.0273	0.0275	0.0204	0.0201	0.0204	0.0136	0.0138	0.0134	0.011	0.0105	0.0103	0.0132	0.0138	0.0131	0.0067	0.0066	0.0064
Glu_436	M4	0.0082	0.0083	0.0082	0.0078	0.0078	0.008	0.0093	0.0078	0.0097	0.0059	0.006	0.0058	0.0084	0.0082	0.0083	0.0076	0.0076	0.0074	0.0079	0.0075	0.0082	0.0056	0.0054	0.005	0.0099	0.0098	0.0096	0.0094	0.0093	0.0093	0.0091	0.0089	0.0093	0.0047	0.0049	0.0049
Glu_437	M5	0.2087	0.207	0.2056	0.1961	0.1988	0.1987	0.2449	0.2464	0.245	0.1516	0.1552	0.1539	0.2132	0.2124	0.212	0.2035	0.2034	0.2037	0.2233	0.2235	0.2213	0.1468	0.1477	0.1481	0.258	0.2553	0.2573	0.2541	0.2525	0.2551	0.2386	0.2379	0.2407	0.1264	0.1293	0.131
Gln_431	M0	0.6729	0.6699	0.6689	0.6727	0.6756	0.6733	0.6706	0.6664	0.6712	0.6831	0.6764	0.6727	0.6677	0.6672	0.6674	0.6692	0.6682	0.6687	0.6584	0.6609	0.6607	0.6713	0.6691	0.6705	0.665	0.6639	0.6632	0.6685	0.6705	0.6652	0.6632	0.6627	0.6629	0.6702	0.6672	0.668
Gln_432	M1	0.0006	0.0011	0.0028	0.003	0.0018	0.0034	0.0011	0.0019	0.0029	0.0004	0.0027	0.0017	0.0013	0	0.0018	0.0033	0.0022	0.0018	0.0054	0.0027	0.0024	0.0029	0.0032	0.0021	-0.0003	0.0003	0.0013	0.0002	-0.0015	0.0022	0.0027	0.0019	0.0018	0.0011	0.0021	0.0015
Gln_433	M2	-0.0015	-0.0013	-0.0017	-0.0006	-0.0007	-0.0008	-0.0007	-0.0004	-0.0012	-0.0008	-0.0007	-0.0013	-0.0003	-0.0004	-0.0006	-0.0015	-0.0001	-0.0007	-0.0013	-0.0011	-0.0009	-0.0011	-0.0007	-0.0008	-0.0009	-0.0015	-0.002	-0.0003	-0.001	0.0005	-0.0009	-0.0018	-0.0021	0	-0.0014	-0.001
Gln_434	M3	0.0012	0.0006	0.0008	0.0004	0.0001	0.0002	0.0005	0.0003	0.0009	0.0002	0.0003	0	0.0016	0.0016	0.0019	0.0012	0.0012	0.0012	0.0005	0.0011	0.001	0.001	0.0005	0.0008	0.0006	-0.0001	0.0006	0.0005	0.0008	0	0	0.0005	0.0009	0.0004	-0.0001	-0.0007
Gln_435	M4	-0.0042	-0.0013	-0.0027	-0.0016	-0.0025	-0.0034	-0.0033	-0.0011	-0.0036	-0.002	-0.0014	-0.0015	0.0072	0.01	0.0022	0.0129	0.0124	0.012	0.011	0.011	0.0079	0.0104	0.0121	0.0115	0.0084	0.011	0.0109	0.0117	0.0107	0.0119	0.0051	0.0071	0.0058	0.0096	0.0111	0.0102
Gln_436	M5	0.3238	0.3221	0.3245	0.3186	0.3183	0.3204	0.3235	0.3244	0.3269	0.314	0.3202	0.3153	0.3236	0.3222	0.3274	0.3147	0.3159	0.3167	0.3257	0.3254	0.3285	0.314	0.3133	0.3147	0.3245	0.3219	0.3217	0.3168	0.3173	0.3167	0.3268	0.3261	0.328	0.318	0.3139	0.315
Cit_591	M0	0.7526	0.7574	0.7434	0.7605	0.7568	0.7634	0.7837	0.7897	0.7899	0.8652	0.8525	0.8504	0.7407	0.7394	0.7386	0.7442	0.7514	0.7497	0.7869	0.7877	0.7823	0.8609	0.8572	0.8626	0.7663	0.7829	0.7745	0.7864	0.7957	0.7982	0.7865	0.7904	0.778	0.902	0.889	0.8895
Cit_592	M1	0.0426	0.0262	0.0414	0.0514	0.0351	0.0369	0.0208	0.0134	0.0162	0.0236	0.037	0.0525	0.0133	0.0186	0.0212	0.0262	0.0201	0.0198	0.0135	0.0078	0.0151	0.0059	0.0047	0.0081	0.021	0.0125	0.0112	0.0147	0.0118	0.0064	0.0041	0.0073	0.0073	0.0087	0.0162	0.0158
Cit_593	M2	0.0345	0.0362	0.036	0.022	0.0392	0.0325	0.0118	-0.0006	0.0194	0.0108	0.0103	-0.0075	0.0454	0.0364	0.0363	0.0312	0.0299	0.0329	0.0122	0.0165	0.0168	0.0104	0.0147	0.004	0.0235	0.0129	0.0208	0.0141	0.0145	0.0078	0.0093	0.007	0.009	-0.0036	0.0019	-0.0018
Cit_594	M3	0.0623	0.0679	0.0661	0.0591	0.0585	0.0506	0.048	0.063	0.0489	0.026	0.026	0.0301	0.055	0.0622	0.0604	0.0576	0.0579	0.0559	0.0469	0.051	0.0454	0.0322	0.0309	0.0325	0.0288	0.0325	0.0316	0.0259	0.0293	0.0303	0.0343	0.0293	0.0358	0.0175	0.0105	0.0194
Cit_595	M4	0.0536	0.06	0.0597	0.046	0.0428	0.0562	0.0826	0.0701	0.0636	0.0461	0.0492	0.0464	0.067	0.0632	0.0647	0.0619	0.0622	0.0621	0.0859	0.0803	0.0834	0.0443	0.0465	0.0473	0.0781	0.0704	0.0769	0.0639	0.063	0.0645	0.1146	0.1123	0.1159	0.0399	0.0453	0.0429
Cit_596	M5	0.0625	0.0579	0.0566	0.0652	0.0722	0.0671	0.0632	0.0712	0.0717	0.0376	0.0356	0.0388	0.0804	0.0808	0.0803	0.079	0.0778	0.0823	0.0563	0.0568	0.058	0.0465	0.0465	0.0463	0.0825	0.0937	0.0935	0.1005	0.0969	0.1052	0.0561	0.0643	0.0584	0.0439	0.0408	0.0373
Cit_597	M6	0.0003	-0.0004	0.0037	-0.0003	-0.0001	-0.003	0.0004	-0.0018	-0.0036	0	-0.0008	-0.0036	-0.0006	0.0016	0.0001	0.0013	0.0021	-0.0022	-0.0007	0.0012	0.0006	0.0013	0.0004	0.0003	0.0055	0.0021	-0.0007	0.0025	-0.0026	-0.0044	-0.0006	-0.0007	-0.0007	-0.0049	-0.0003	-0.0011
Akg_346	M0	0.6995	0.7136	0.7104	0.7221	0.7324	0.7334	0.6961	0.6988	0.7094	0.8225	0.8177	0.8346	0.7048	0.6999	0.7063	0.723	0.7168	0.7192	0.7282	0.7258	0.7328	0.8349	0.828	0.8359	0.7123	0.7118	0.7093	0.7215	0.7168	0.7155	0.7268	0.7209	0.7254	0.8696	0.8556	0.8572
Akg_347	M1	0.0143	0.0119	0.0193	0.0159	0.0087	0.0135	0.0086	0.0153	0.0016	0.0117	0.0117	0.0011	0.011	0.0158	0.0088	0.0066	0.0084	0.0119	0.0087	0.011	0.0095	0.0025	0.0056	0.0002	0.0015	0	0.0043	-0.0038	0.0024	0.0002	0.0018	0.0025	-0.0022	0.0021	0.0013	0.0013
Akg_348	M2	0.0277	0.0251	0.0193	0.0219	0.0213	0.0154	0.0099	0.0116	0.0119	0.0081	0.0104	0.0045	0.0216	0.0219	0.0218	0.0185	0.0226	0.0171	0.0145	0.0121	0.0109	0.0115	0.009	0.0077	0.0066	0.0089	0.0072	0.0049	0.0033	0.0061	0.0106	0.0107	0.0077	-0.0013	0.0089	0.0132
Akg_349	M3	0.0347	0.0329	0.032	0.0274	0.0251	0.034	0.0202	0.0145	0.0152	0.0118	0.008	0.0123	0.0478	0.0464	0.0453	0.0434	0.0429	0.0438	0.0315	0.0347	0.0325	0.0205	0.0226	0.0229	0.0135	0.0117	0.0123	0.0107	0.0102	0.0106	0.0139	0.0183	0.0182	0.0077	0.0076	0.0058
Akg_350	M4	0.0097	0.0111	0.0104	0.01	0.0094	0.0083	0.0082	0.0077	0.0058	0.0028	0.0018	0.0088	0.0063	0.008	0.0085	0.0072	0.0075	0.0082	0.0085	0.0077	0.01	0.0041	0.0057	0.0026	0.0056	0.0082	0.0085	0.0086	0.0109	0.0094	0.0084	0.0057	0.0108	0.0012	0.0028	0.0031
Akg_351	M5	0.2021	0.2013	0.2009	0.1954	0.1973	0.1928	0.253	0.2441	0.2571	0.1404	0.1454	0.1387	0.2068	0.2081	0.2055	0.1986	0.1988	0.1998	0.2073	0.2079	0.2037	0.1255	0.1268	0.1284	0.2593	0.2611	0.2591	0.2605	0.2578	0.2563	0.2386	0.2413	0.2446	0.1224	0.126	0.119
