# Supplementary material for: Environmental cystine drives glutamine anaplerosis and sensitizes cancer cells to glutaminase inhibition
Source: eLife journal article supplement (doi:10.7554/elife.27713), 2017-08-15
Supplement: supp [file elife-27713-supp-v1.zip › elife_poa_e27713_Figure_5_Source_Data_1.xlsx]

## Sheet: Fig5B
				Untreated							Cystine gavage								Plasma
Metabolite	Label	Mouse 1 Tumor 1	Mouse 1 Tumor 2	Mouse 2 Tumor 1	Mouse 2 Tumor 2	Mouse 3 Tumor 1	Mouse 3 Tumor 2	Mouse 4 Tumor 1	Mouse 4 Tumor 2	Mouse 5 Tumor 1	Mouse 5 Tumor 2	Mouse 6 Tumor 1	Mouse 6 Tumor 2	Mouse 7 Tumor 1	Mouse 7 Tumor 2	Mouse 1	Mouse 2	Mouse 3	Mouse 4	Mouse 5	Mouse 6	Mouse 7
Fum_287	M0	0.8998	0.8926	0.9064	0.9631	0.9281	0.9244	0.8837	0.8402	0.8733	0.8429	0.9218	0.8713	0.8712	0.7609
Fum_288	M1	0.0244	0.0234	0.0256	0.0083	0.0165	0.0184	0.0362	0.0493	0.0403	0.0397	0.017	0.0311	0.0307	0.0456
Fum_289	M2	0.0244	0.0264	0.026	0.0156	0.026	0.0226	0.0323	0.0416	0.0315	0.043	0.0236	0.0315	0.0345	0.0559
Fum_290	M3	0.0147	0.0162	0.016	0.0037	0.0084	0.0082	0.0132	0.0255	0.0188	0.0172	0.0102	0.0187	0.0147	0.0303
Fum_291	M4	0.0362	0.0427	0.0262	0.0111	0.0227	0.0269	0.0364	0.0444	0.0366	0.0579	0.0285	0.0493	0.0499	0.1077
Mal_419	M0	0.9122	0.8977	0.913	0.9687	0.9382	0.9349	0.8941	0.8477	0.878	0.8451	0.9361	0.8742	0.8805	0.7662
Mal_420	M1	0.0238	0.0257	0.0297	0.0121	0.0181	0.0173	0.0362	0.0528	0.0436	0.0437	0.0168	0.0338	0.0325	0.0496
Mal_421	M2	0.0143	0.0181	0.0163	0.0045	0.0102	0.0121	0.0208	0.0299	0.0236	0.036	0.009	0.0255	0.0231	0.0467
Mal_422	M3	0.0145	0.0161	0.0158	0.0039	0.0102	0.0088	0.0132	0.0258	0.0193	0.017	0.0093	0.0174	0.0153	0.0296
Mal_423	M4	0.0354	0.0421	0.0255	0.0104	0.0225	0.0267	0.0358	0.0437	0.0351	0.0588	0.0277	0.0493	0.0489	0.1071
Asp_418	M0	0.9356	0.9264	0.9374	0.9914	0.9574	0.9503	0.9381	0.8893	0.9145	0.8629	0.9402	0.9043	0.9247	0.8063
Asp_419	M1	0.0124	0.0095	0.0149	-0.0051	0.0078	0.0084	0.0093	0.0273	0.0279	0.0343	0.0184	0.0223	0.0174	0.032
Asp_420	M2	0.0135	0.0157	0.0153	0.0058	0.0117	0.0131	0.0199	0.0266	0.0173	0.0362	0.0104	0.0207	0.0177	0.0445
Asp_421	M3	0.0086	0.0103	0.0096	0.0021	0.0077	0.0052	0.0072	0.0167	0.0134	0.0109	0.0072	0.0144	0.0081	0.0206
Asp_422	M4	0.0298	0.0371	0.0221	0.0054	0.0157	0.0228	0.0244	0.0397	0.0262	0.0564	0.0252	0.0385	0.0331	0.0976
Glu_432	M0	0.8899	0.8733	0.8932	0.9631	0.9327	0.9147	0.9036	0.8377	0.8618	0.8103	0.9261	0.84	0.8604	0.8633
Glu_433	M1	0.0236	0.0244	0.0298	0.0179	0.009	0.0221	0.0149	0.0327	0.0284	0.0411	0.0058	0.0255	0.0388	0.0212
Glu_434	M2	0.0116	0.0115	0.0136	0.0049	0.0063	0.0094	0.0123	0.0251	0.0178	0.025	0.0045	0.0205	0.0208	0.0146
Glu_435	M3	0.0128	0.0147	0.0132	0.0007	0.0099	0.0106	0.0152	0.027	0.0186	0.0333	0.0105	0.0309	0.0227	0.0212
Glu_436	M4	0.0024	0.003	0.0019	0.0002	0.0013	0.0014	0.002	0.0034	0.003	0.0038	0.0022	0.0031	0.0021	0.0029
Glu_437	M5	0.0593	0.0727	0.048	0.0125	0.0386	0.0413	0.0498	0.074	0.0701	0.0866	0.0501	0.0797	0.0552	0.0767
Gln_431	M0	0.5634	0.5284	0.6459	0.7966	0.6762	0.6903	0.5843	0.5697	0.5502	0.584	0.5702	0.4696	0.7171	0.4203	0.5065	0.5576	0.5847	0.5865	0.6164	0.4917	0.4635
Gln_432	M1	0.0099	0.0103	0.0135	0.005	0.0061	0.0097	0.0132	0.0141	0.0143	0.0213	0.01	0.013	0.0204	0.0118	0.0205	0.019	0.017	0.0288	0.0332	0.0277	0.0346
Gln_433	M2	0.0041	0.0045	0.0054	0.0033	0.0015	0.0042	0.0054	0.0074	0.0069	0.0099	0.0021	0.0057	0.006	0.0059	0.0098	0.0075	0.0062	0.0134	0.0146	0.0134	0.0205
Gln_434	M3	0.0072	0.0076	0.0066	0.0018	0.0056	0.0055	0.0113	0.0111	0.0099	0.0121	0.0102	0.0112	0.0093	0.0129	0.0142	0.0099	0.0102	0.0174	0.0174	0.0234	0.0356
Gln_435	M4	-0.0057	-0.0066	0.0014	0.0079	0.0108	0.0087	0.0054	-0.0038	-0.0051	-0.008	0.0128	0.0114	0.0093	0.0038	0.0166	0.0151	0.0123	0.0134	0.0122	0.0164	0.017
Gln_436	M5	0.4153	0.4502	0.3225	0.184	0.2947	0.2781	0.3785	0.3976	0.421	0.3724	0.3941	0.4874	0.2341	0.5445	0.4296	0.3902	0.3689	0.34	0.306	0.4261	0.4278
Cit_591	M0	0.8976	0.9076	0.9013	0.9732	0.9307	0.9436	0.8812	0.8221	0.8591	0.8478	0.9448	0.8345	0.8623	0.8503
Cit_592	M1	0.037	0.0324	0.0376	0.0122	0.0278	0.0212	0.0515	0.0717	0.0553	0.0533	0.0207	0.0576	0.0586	0.0536
Cit_593	M2	0.0115	0.0102	0.0108	-0.0016	0.0043	0.0035	0.016	0.0239	0.02	0.0241	0.005	0.0261	0.0135	0.0196
Cit_594	M3	0.0121	0.0108	0.0142	0.0053	0.0113	0.0088	0.0135	0.024	0.0174	0.02	0.0077	0.0242	0.0222	0.02
Cit_595	M4	0.0184	0.0186	0.0172	0.0059	0.0128	0.0133	0.0191	0.0198	0.024	0.0301	0.0149	0.0303	0.0118	0.0291
Cit_596	M5	0.022	0.0191	0.0174	0.0041	0.0131	0.009	0.017	0.035	0.0221	0.0226	0.0067	0.0247	0.0318	0.0246
Cit_597	M6	0.0014	0.0015	0.0013	0.0004	0.0005	0.0007	0.002	0.0033	0.0022	0.0024	0.0008	0.003	0.001	0.0034
Akg_346	M0	0.9079	0.9152	0.9108	0.9668	0.9334	0.9373	0.8994	0.8653	0.8779	0.863	0.9171	0.8583	0.868	0.7445
Akg_347	M1	0.0079	0.0068	0.0147	-0.0012	0.0075	0.0061	0.0165	0.0165	0.018	0.019	0.0099	0.0096	0.0228	0.0309
Akg_348	M2	0.0072	0.0091	0.011	0.0051	0.0079	0.0055	0.015	0.0192	0.0152	0.0184	0.0095	0.0186	0.0116	0.0327
Akg_349	M3	0.017	0.0136	0.0172	0.0055	0.0108	0.0118	0.0171	0.0279	0.0212	0.0279	0.0096	0.0324	0.0227	0.052
Akg_350	M4	0.0035	0.0028	0.0045	0.0032	0.0038	0.0024	0.0041	0.0041	0.0043	0.0043	0.0029	0.0059	0.0073	0.0106
Akg_351	M5	0.0562	0.0524	0.0423	0.016	0.0333	0.0357	0.0464	0.0681	0.0636	0.0681	0.0481	0.0746	0.0686	0.124
