# Supplementary figures and images for: Environmental cystine drives glutamine anaplerosis and sensitizes cancer cells to glutaminase inhibition
Source: eLife journal article supplement (doi:10.7554/elife.27713), 2017-08-15

Figure 1 Supplement 1

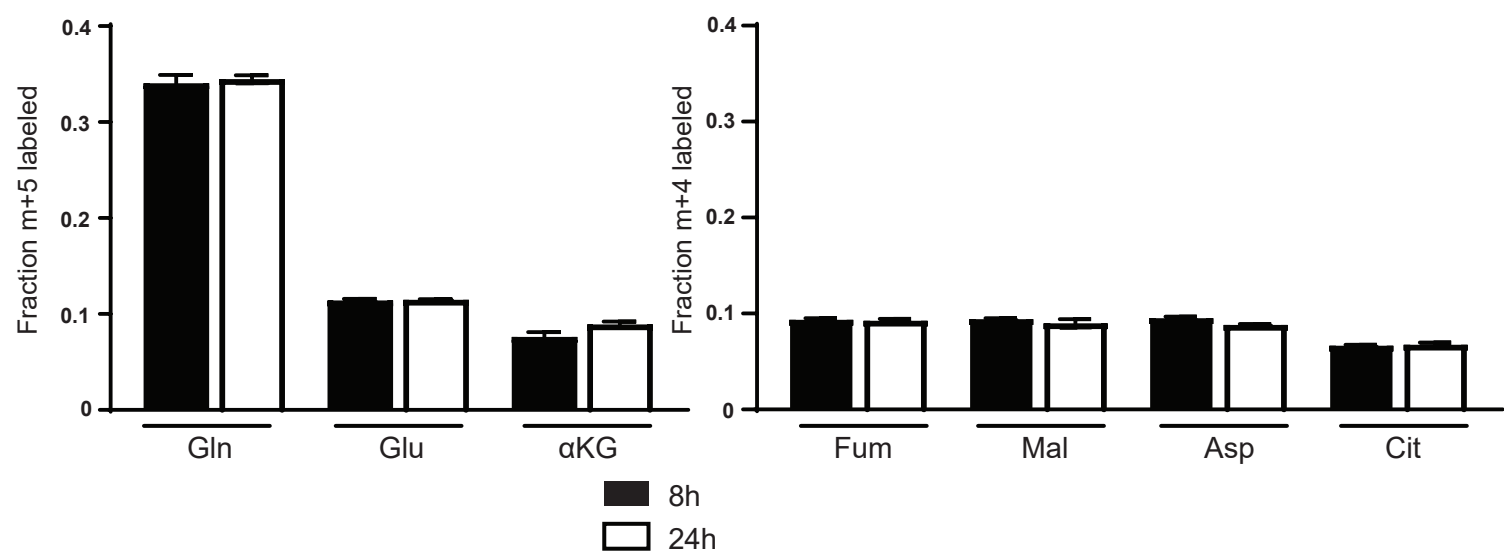

Supplement: supp [file elife-27713-supp-v1.zip]

Figure 1 Supplement 2

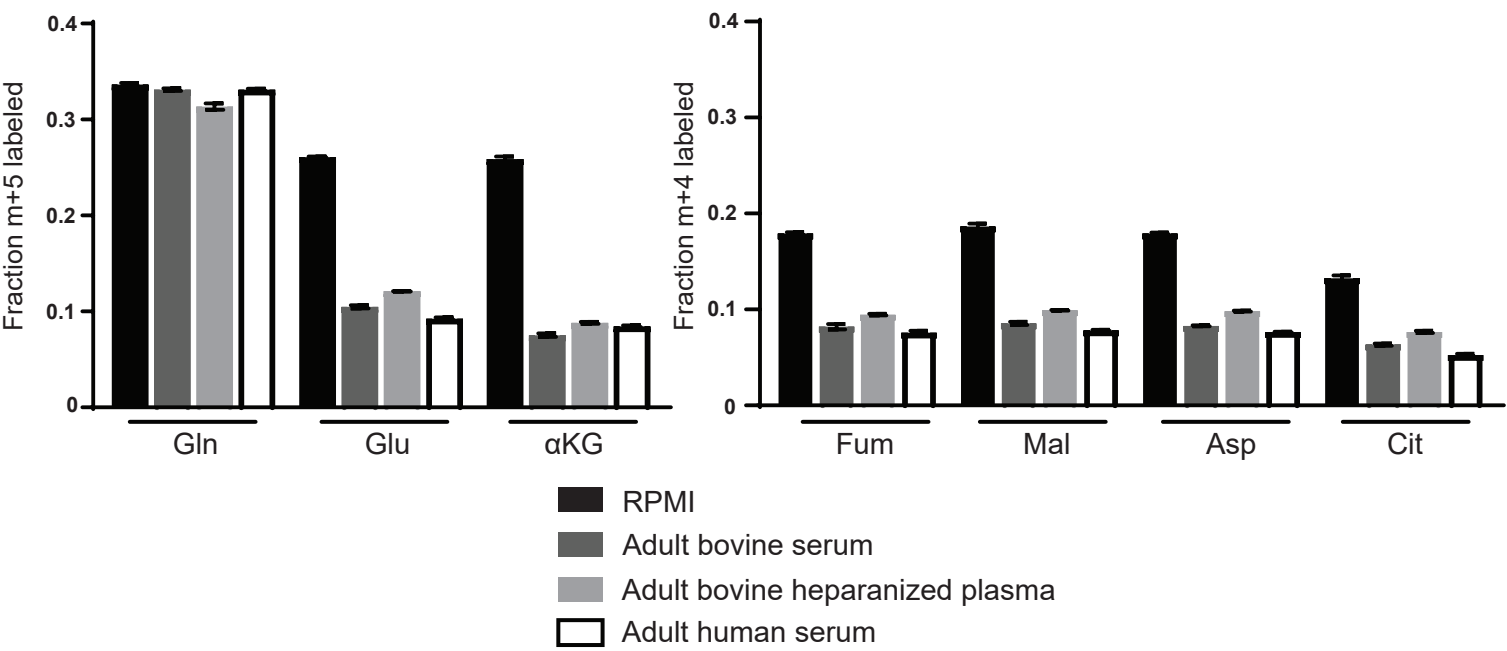

Supplement: supp [file elife-27713-supp-v1.zip]

Figure 4 Supplement 1

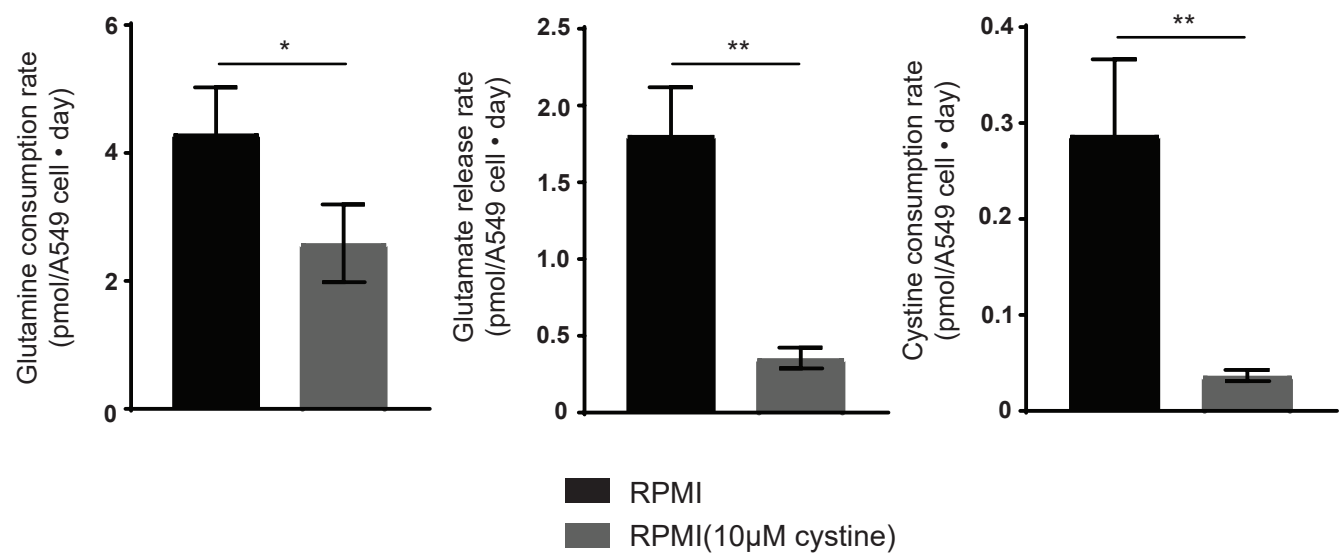

Supplement: supp [file elife-27713-supp-v1.zip]

Figure 2 Supplement 1

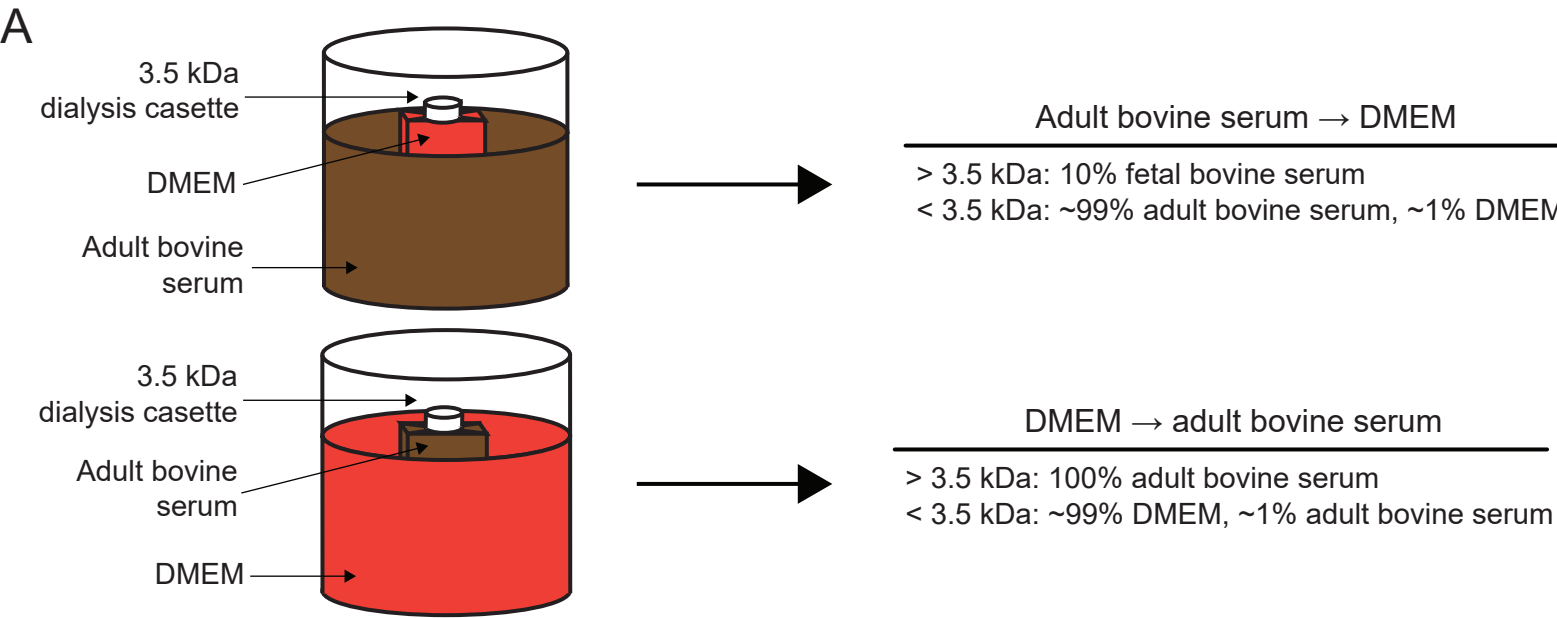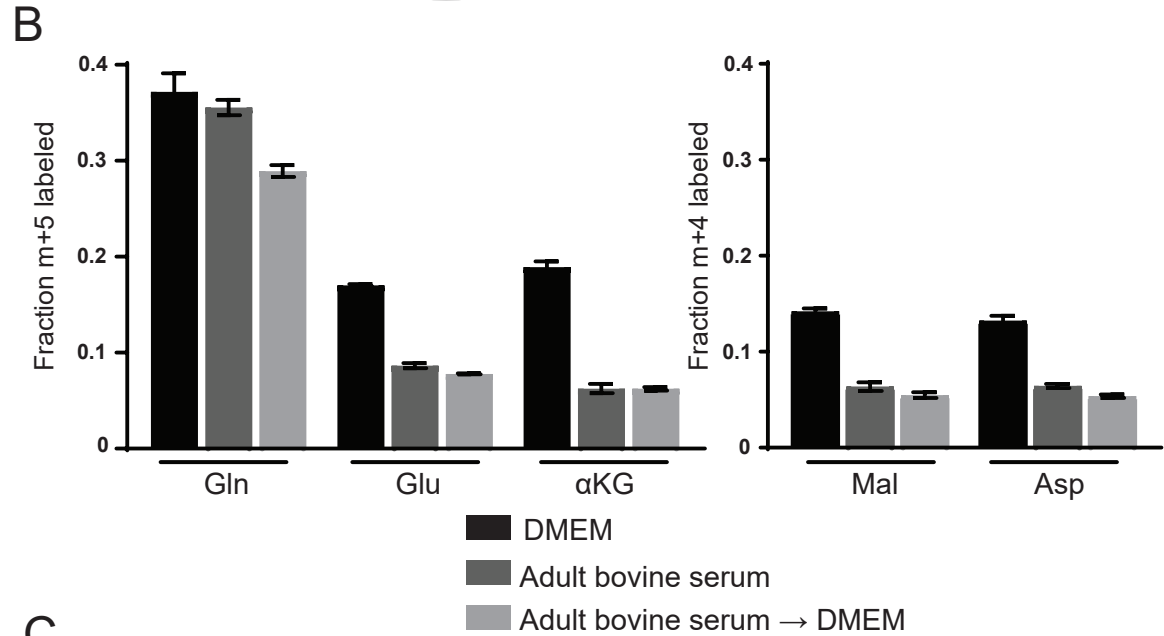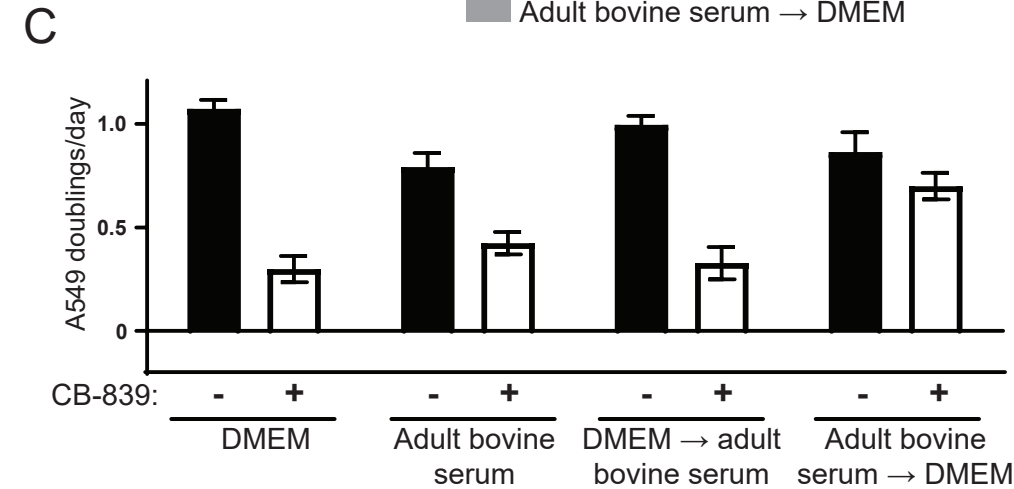

Supplement: supp [file elife-27713-supp-v1.zip › elife_poa_e27713_Figure2Supplement1.pdf]

Figure 3 Supplement 1

A

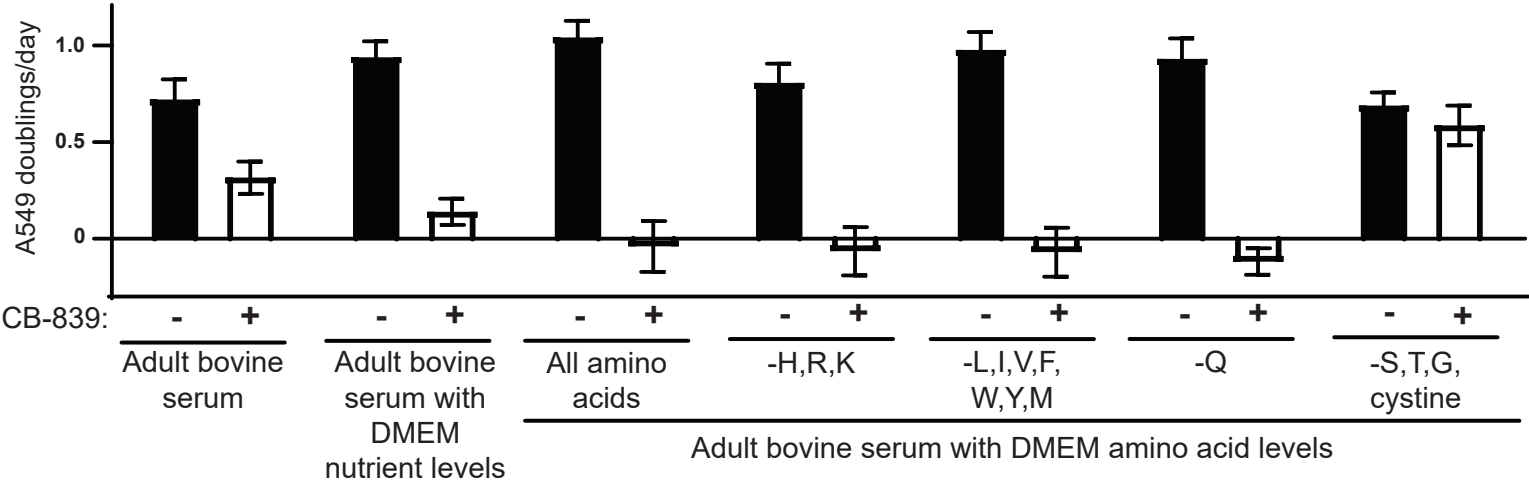

B

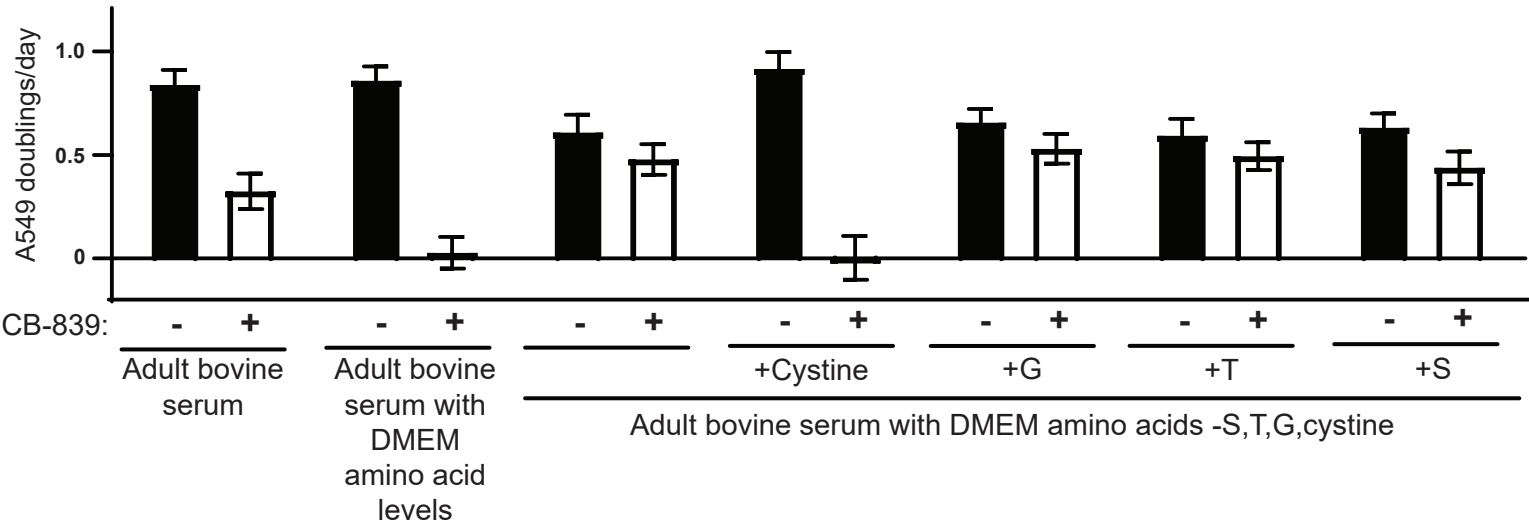

Supplement: supp [file elife-27713-supp-v1.zip › elife_poa_e27713_Figure3Supplement1.pdf]

Figure 3 Supplement 2

A

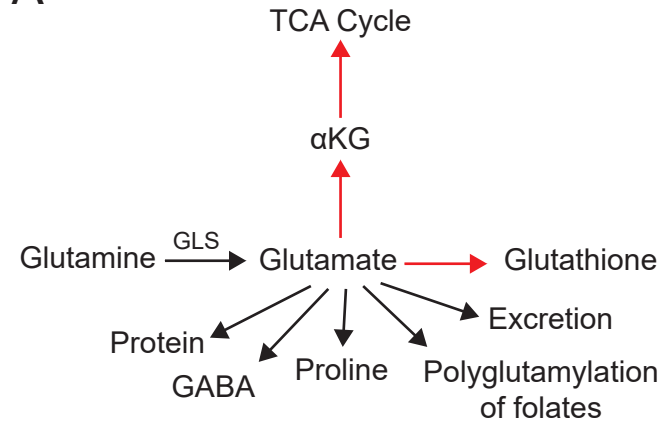

B

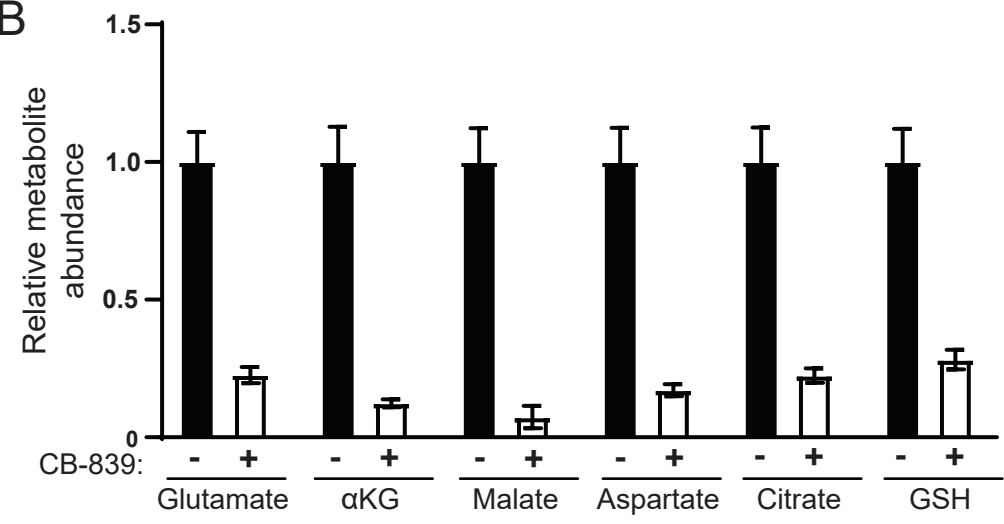

C

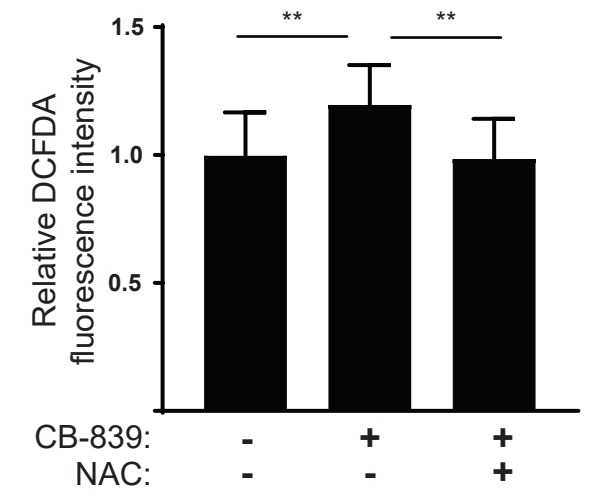

D

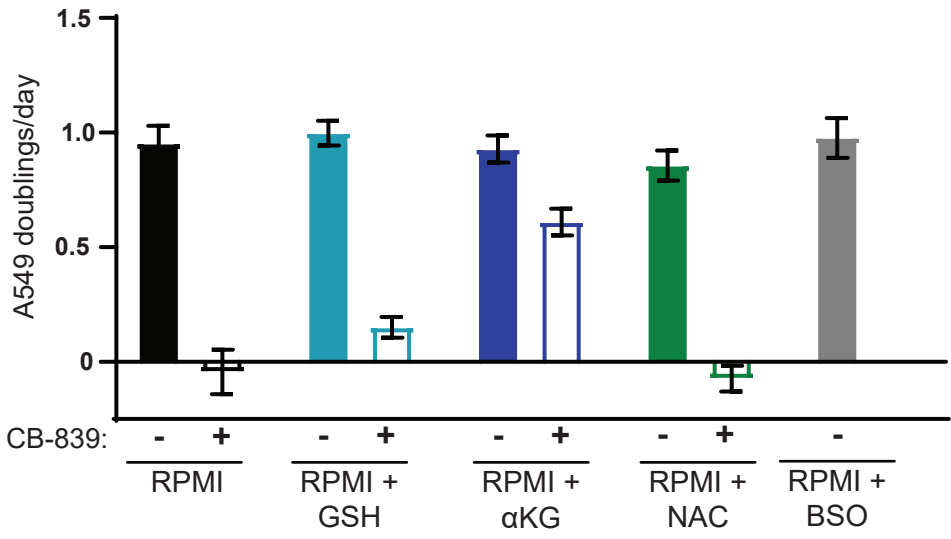

E

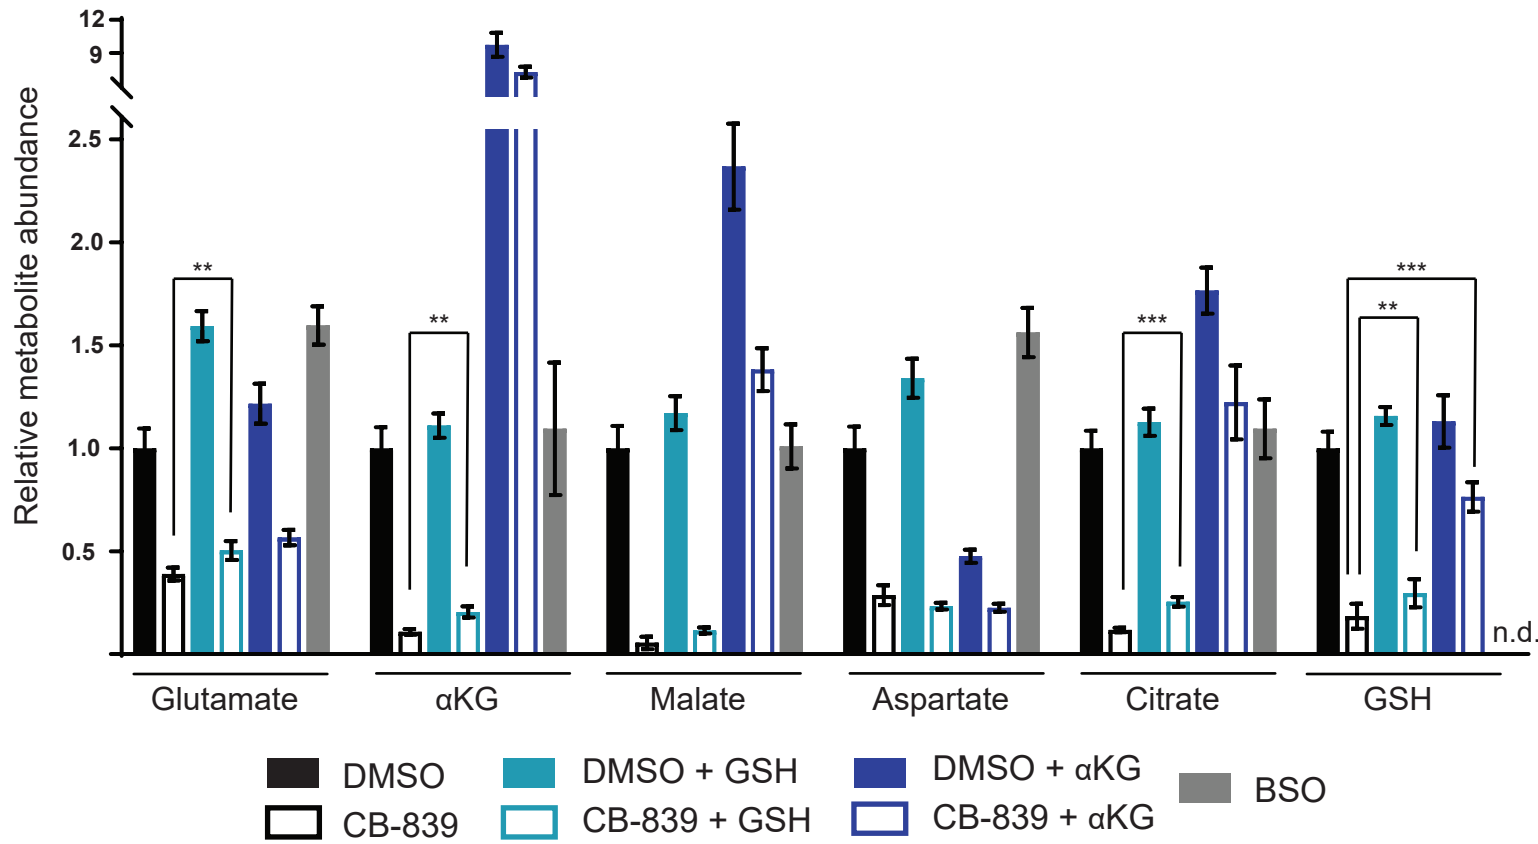

Supplement: supp [file elife-27713-supp-v1.zip › elife_poa_e27713_Figure3Supplement2.pdf]

Figure 4 Supplement 2

A

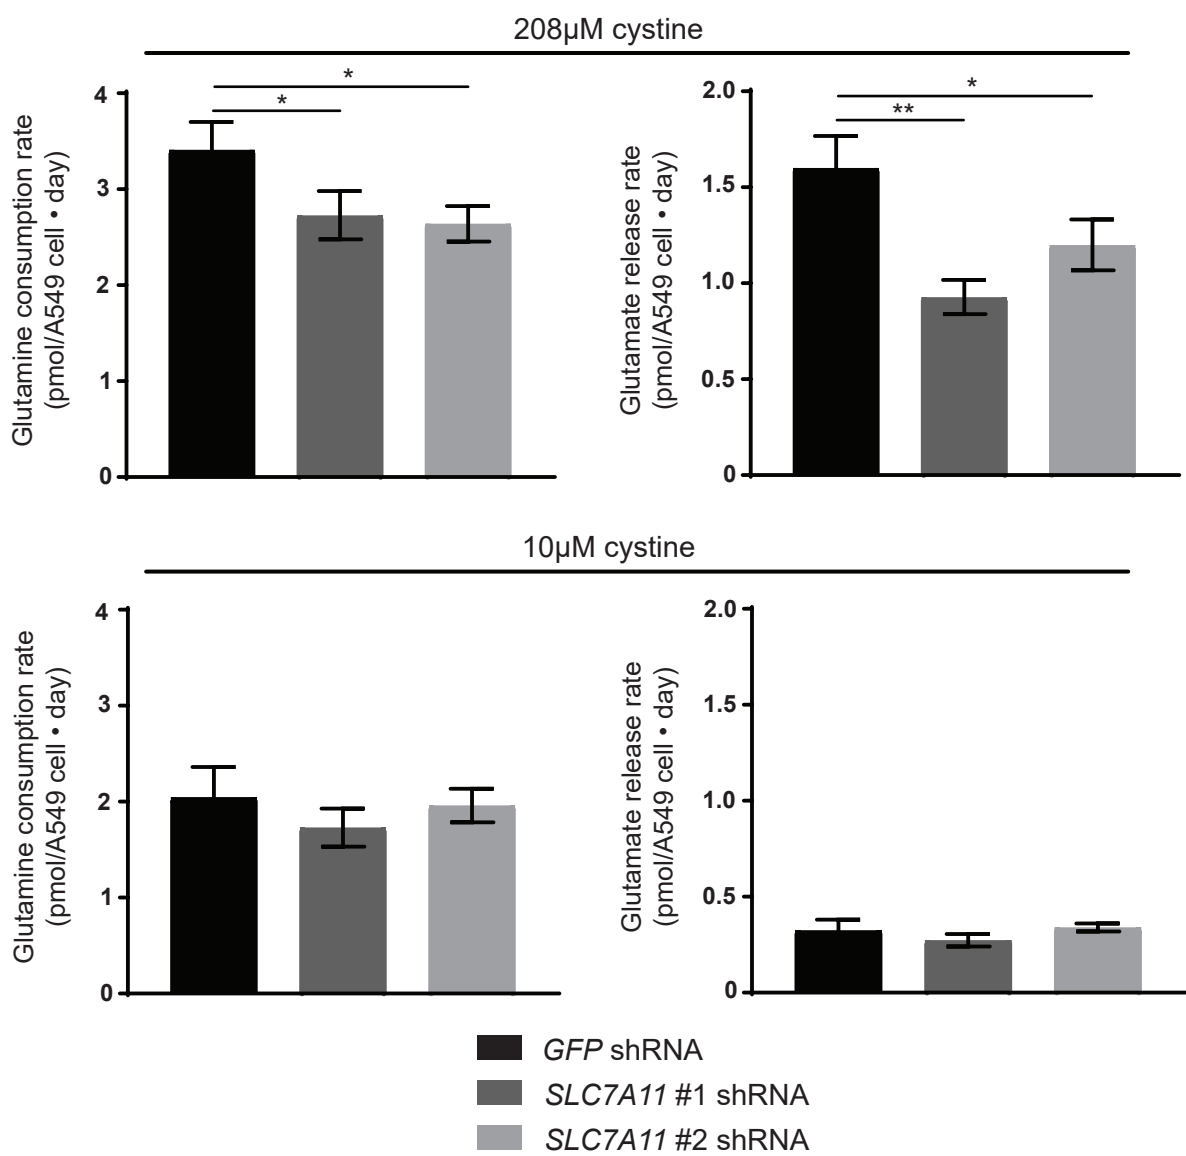

B

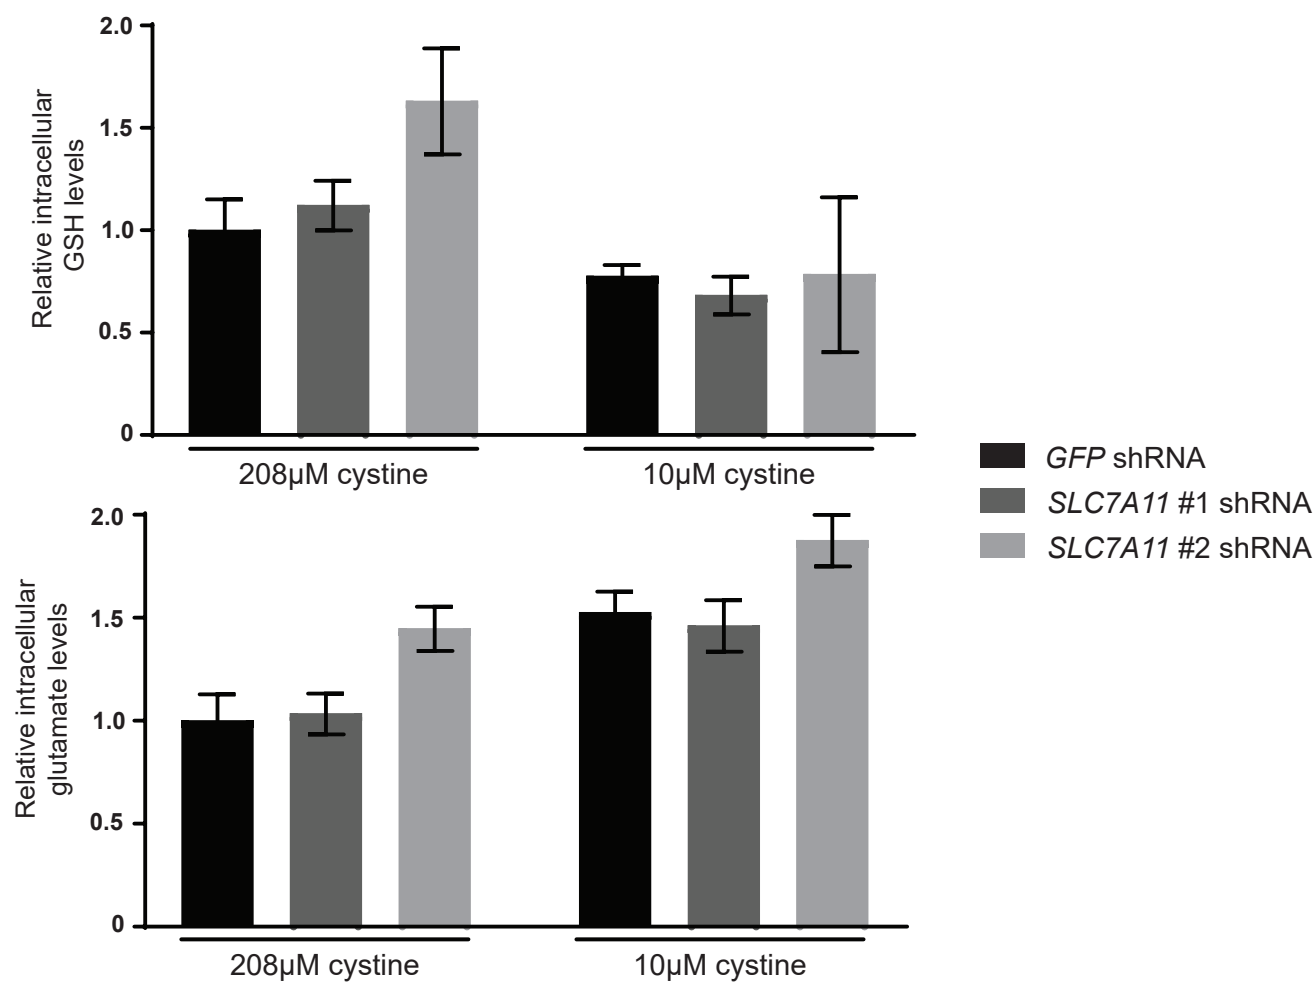

Supplement: supp [file elife-27713-supp-v1.zip › elife_poa_e27713_Figure4Supplement2.pdf]

Figure 1 Supplement 3

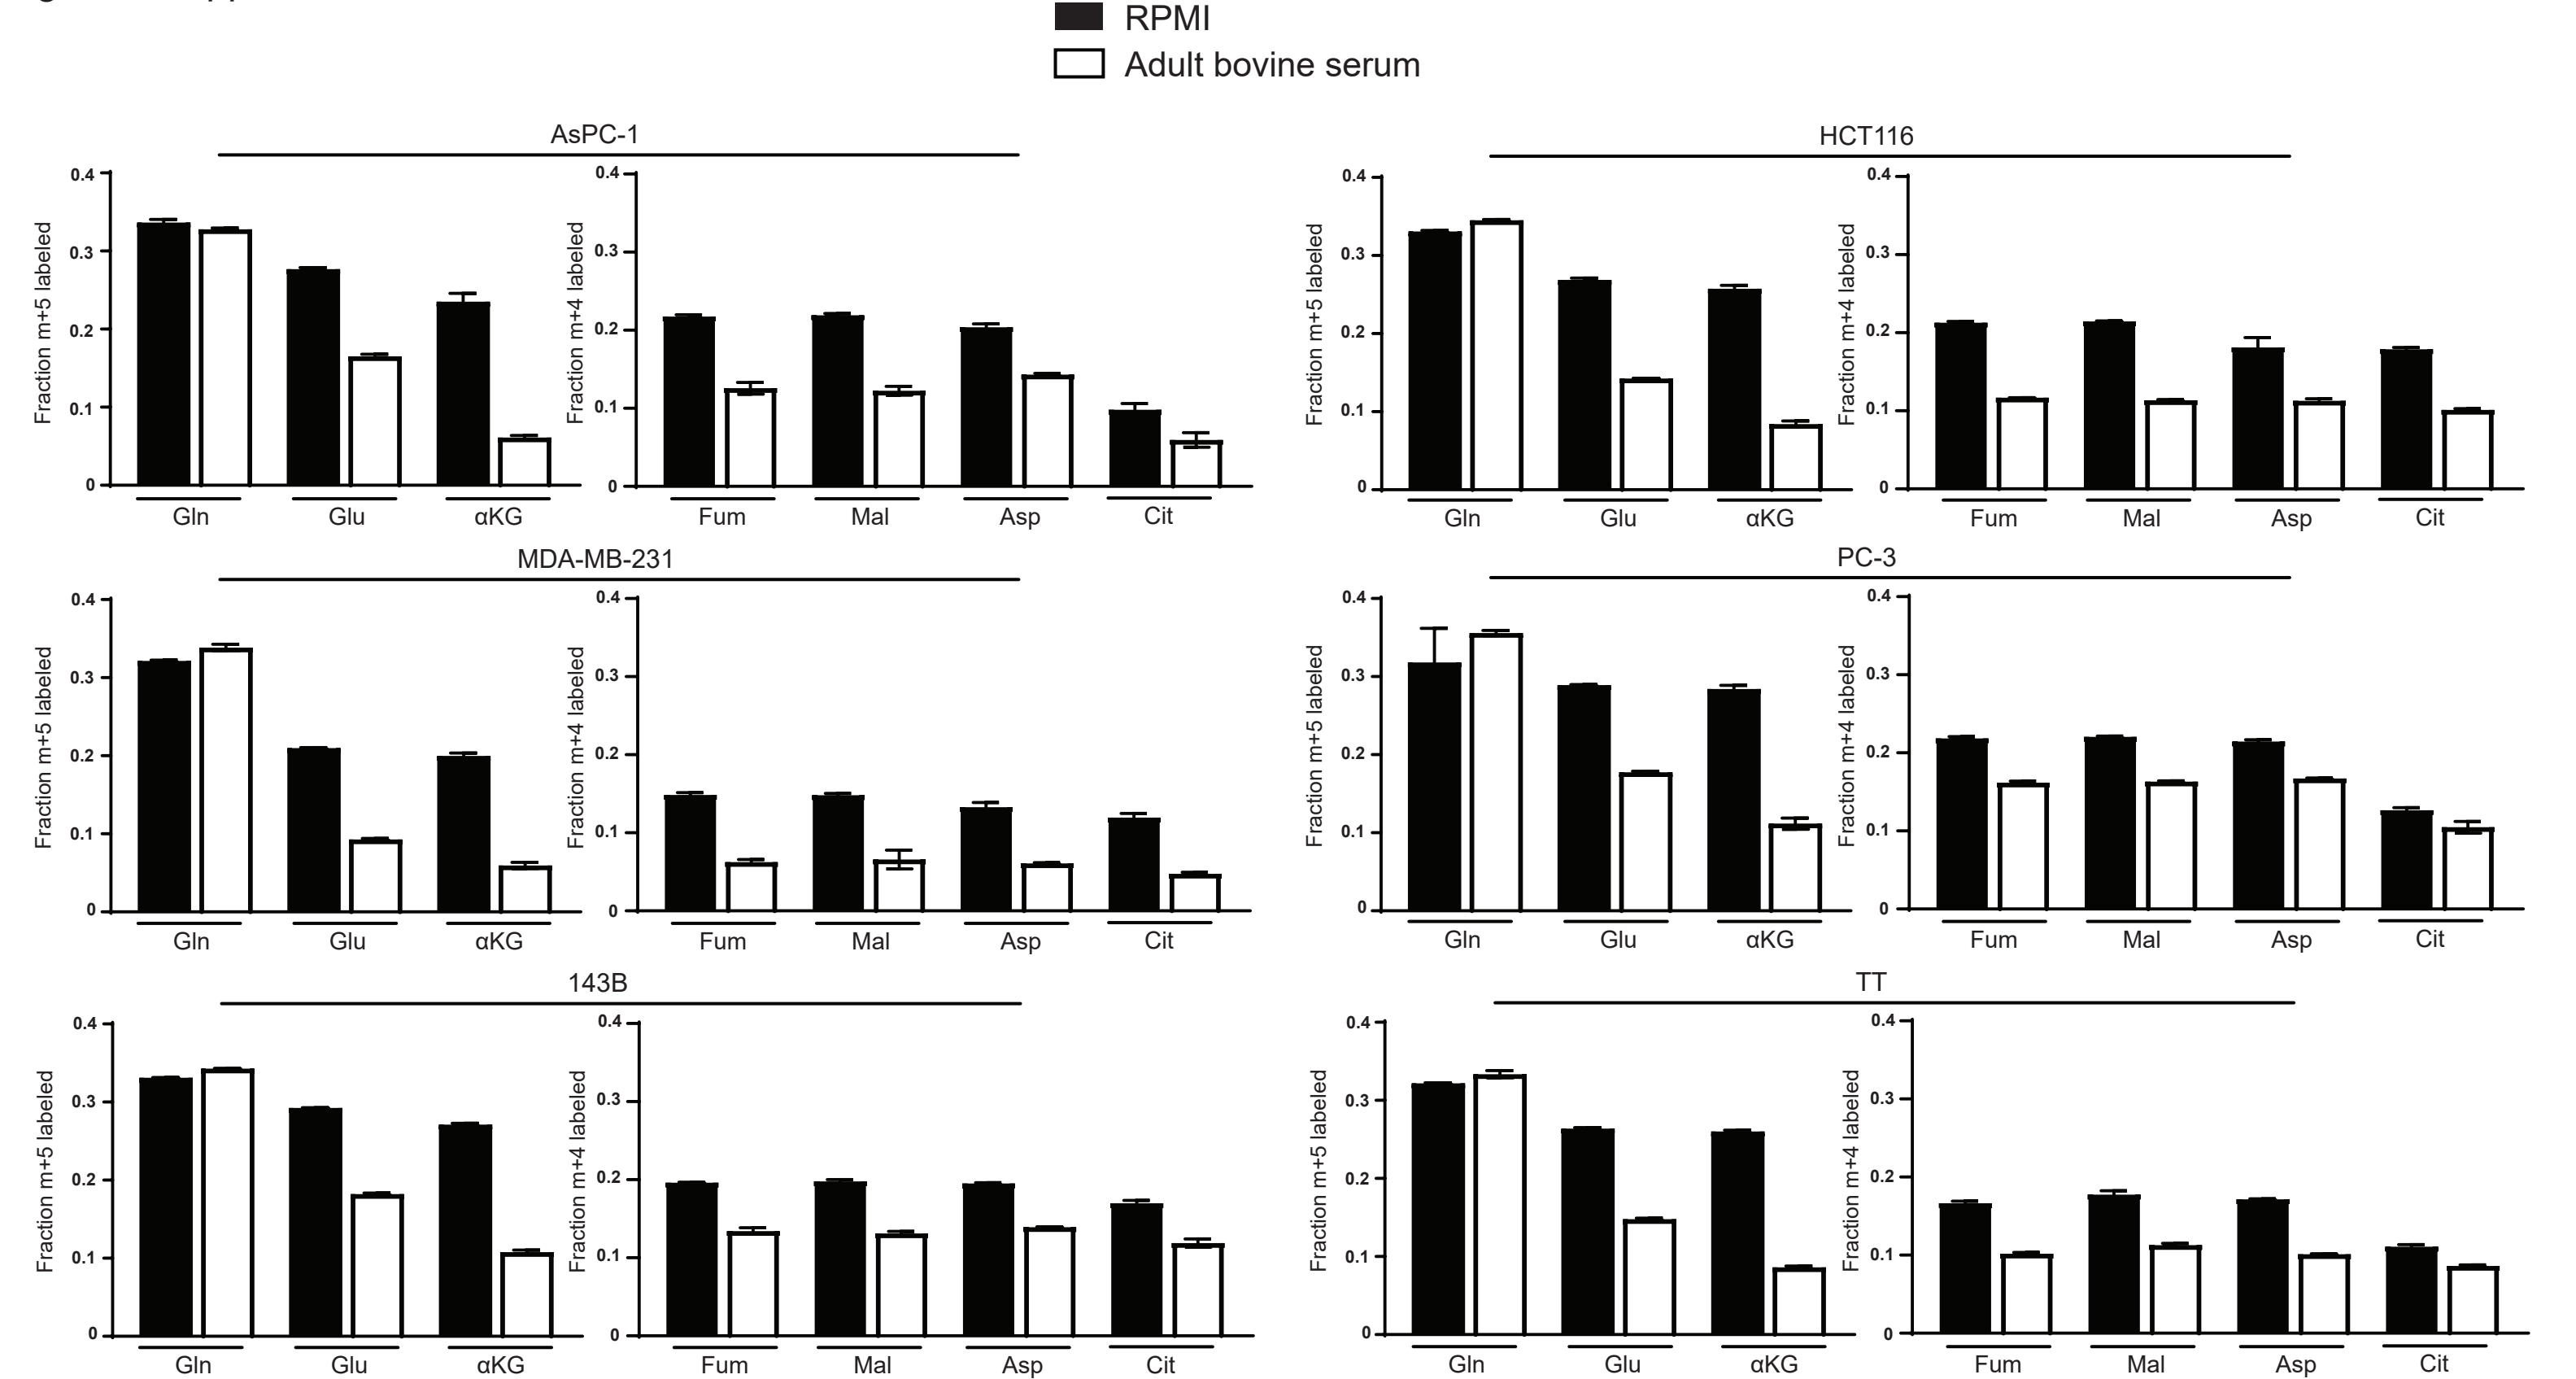

Supplement: supp [file elife-27713-supp-v1.zip › elife_poa_e27713_Figure1Supplement3.pdf]

Figure 4 Supplement 3

A

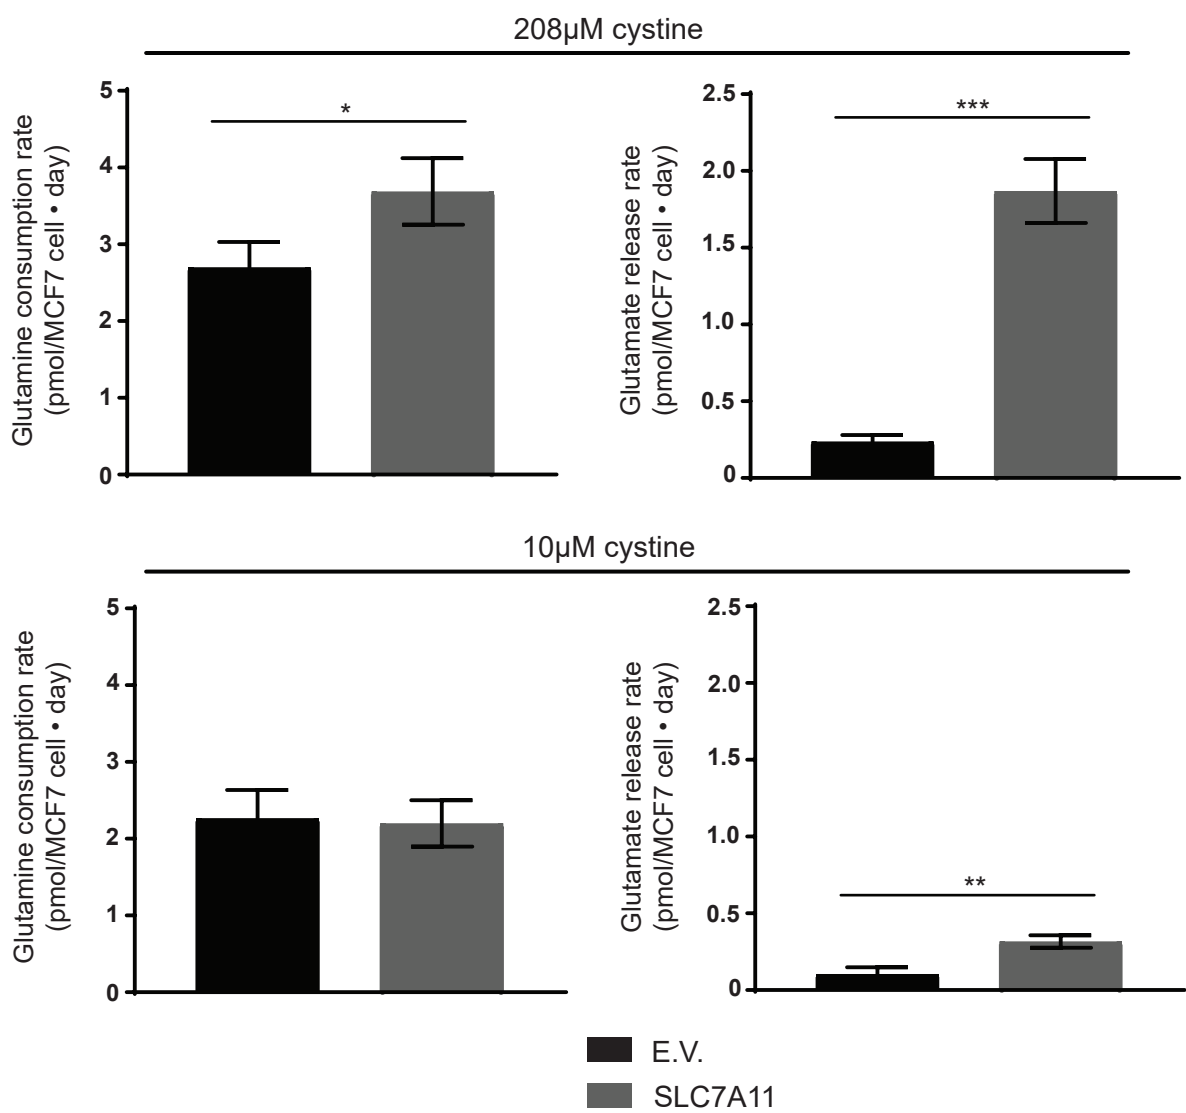

B

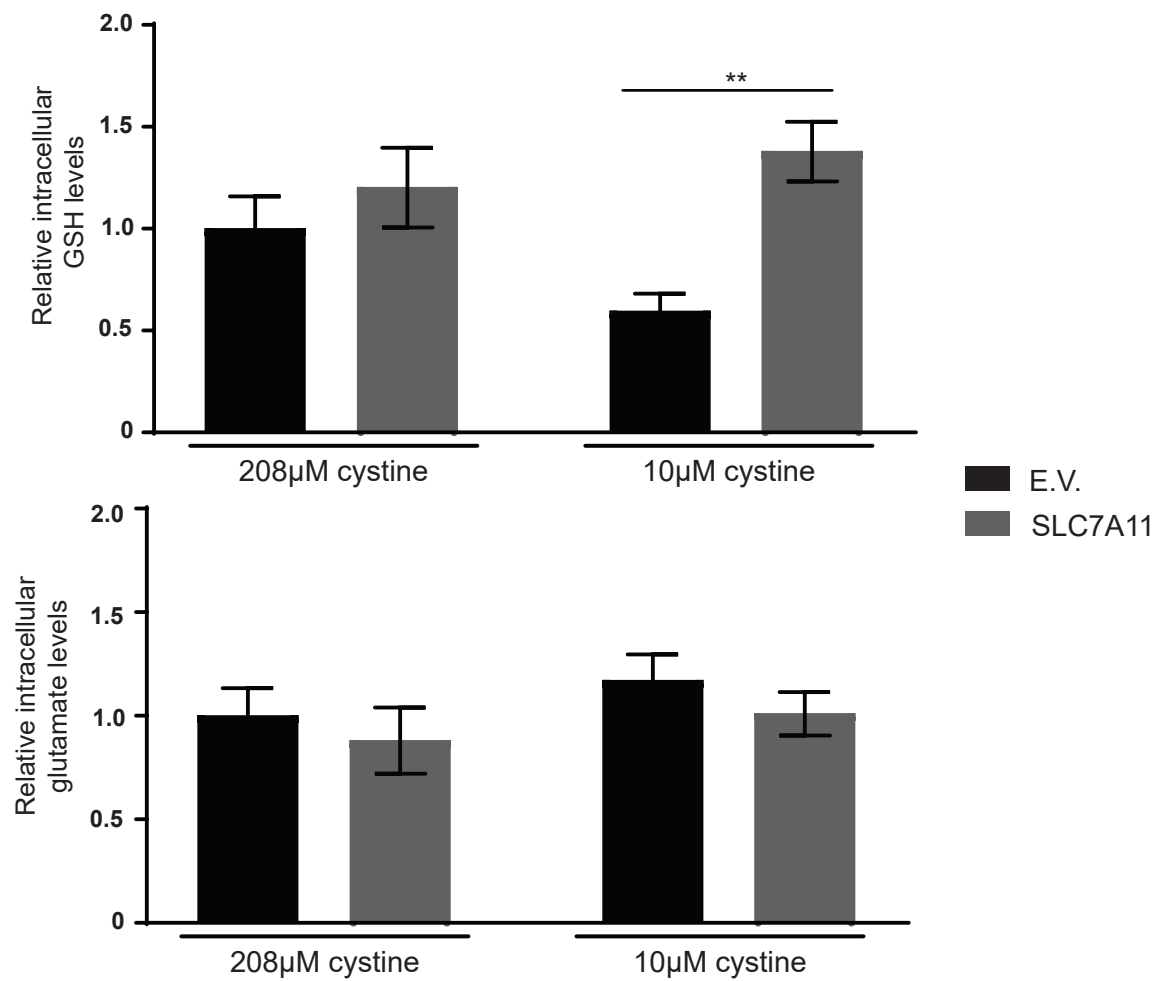

Supplement: supp [file elife-27713-supp-v1.zip › elife_poa_e27713_Figure4Supplement3.pdf]

Figure 4 Supplement 4

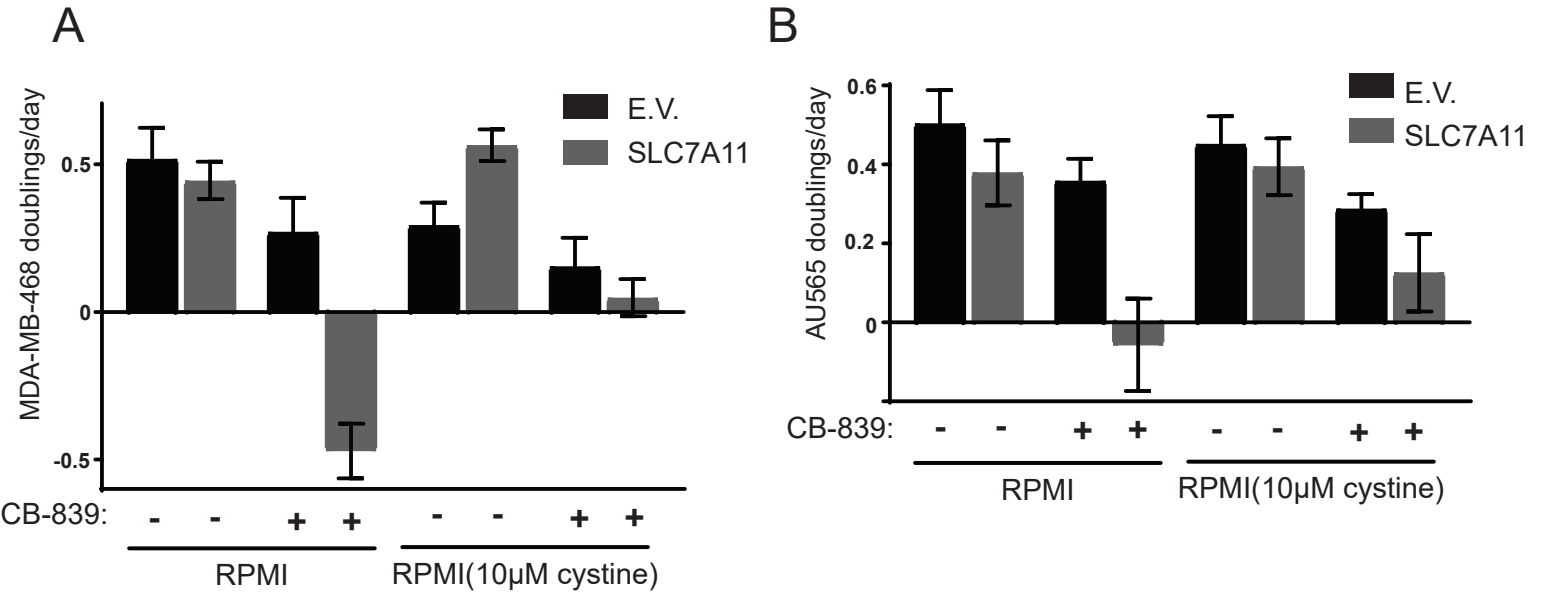

Supplement: supp [file elife-27713-supp-v1.zip › elife_poa_e27713_Figure4Supplement4.pdf]
